# Supplementary material for: New recognition specificity in a plant immune receptor by molecular engineering of its integrated domain
Source: PubMed Central journal article supplement (PMC8938504; doi:10.1038/s41467-022-29196-6), 2022-03-21
Supplement: 41467_2022_29196_MOESM1_ESM.pdf [file 41467_2022_29196_MOESM1_ESM.pdf]

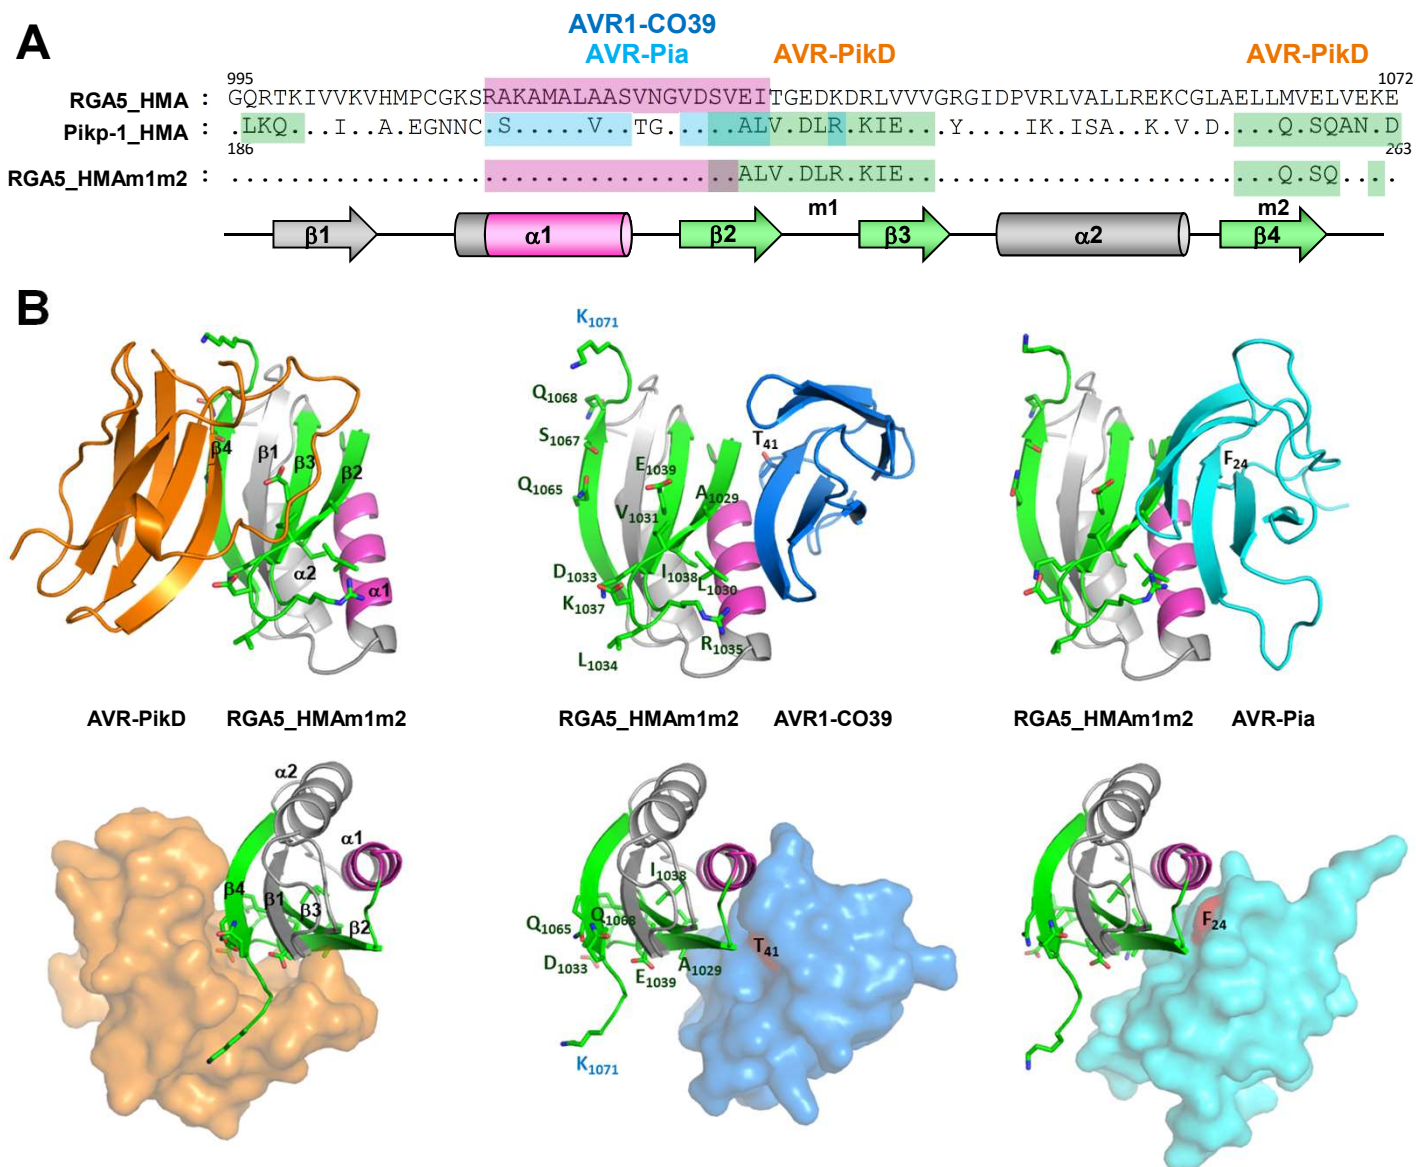

**Supplemental figure 1: 3D models of engineered RGA5\_HMAm1m2 in complex with MAX effectors.**

**A)** Sequence alignment of RGA5 and Pikip-1 HMA domains and of the engineered RGA5\_HMAm1m2. The residues constituting the binding interface in the complexes AVR1-CO39/RGA5\_HMA (PDB\_5ZNG), AVR-Pia/Pikip-1\_HMA (PDB\_6Q76) and AVR-PikD/Pikip-1\_HMA (PDB\_6G10) are highlighted respectively in pink, blue and green. The peptide fragments comprising strands  $\beta$ 2/ $\beta$ 3 and  $\beta$ 4, targeted respectively by the m1 and m2 mutations and extracted from Pikip-1\_HMA crystal structures to construct chimeric 3D models of RGA5\_HMAm1m2, are highlighted in green. **B)** Structural models of RGA5\_HMAm1m2 in complex with AVR-PikD (orange), AVR1-CO39 (blue) and AVR-Pia (cyan) are shown as cartoons (top views) or molecular surfaces (orthogonal bottom views). The different MAX effector/RGA5\_HMAm1m2 complex structures were built by replacing in PDB\_5ZNG the effector molecule and the peptide fragments containing the m1 and m2 mutations by their structural counterpart in PDB\_6G10 or PDB\_6Q76. The secondary structure elements of RGA5\_HMAm1m2 in contact with the MAX effectors are colored as in panel (A). Side chains are shown as sticks for the mutated residues in RGA5\_HMAm1m2, and for the residues replaced in the inactive effector variants AVR1-CO39\_T41G and AVR-Pia\_F24S (both highlighted in red in the bottom views) used as negative control in SPR experiments.

| BD        | AD         | DDO | TDO | TDO + 1 mM 3AT |
|-----------|------------|-----|-----|----------------|
| AVR1-CO39 | RGA5_C-ter |     |     |                |
|           | C-ter_m1m2 |     |     |                |
|           | Pikp-1_HMA |     |     |                |
| BD        | RGA5_C-ter |     |     |                |
|           | C-ter_m1m2 |     |     |                |
|           | Pikp-1_HMA |     |     |                |
| AVR1-CO39 | AD         |     |     |                |

**Supplemental figure 2: The m1m2 mutation does not abolish AVR1-CO39 binding to RGA5\_C-ter.**

Interaction of BD-fused AVR1-CO39 (without signal peptides) with the AD-fused C-terminal domains of RGA5 and RGA5m1m2 (residues 883 to 1116) was assayed by yeast two-hybrid experiments. The HMA domain of Pikp-1 (AD:Pikp-1\_HMA) and the AD and BD domains of GAL4 were used as controls. Four dilutions of diploid yeast clones (1/1, 1/10, 1/100, 1/1000) were spotted on synthetic TDO (-Trp/-Leu/-His) medium and TDO supplemented with 1 mM of 3-amino-1,2,4-triazole (3AT) to assay for interactions and on synthetic DDO (-Trp/-Leu) to monitor proper growth. Pictures were taken after 5 days of growth.

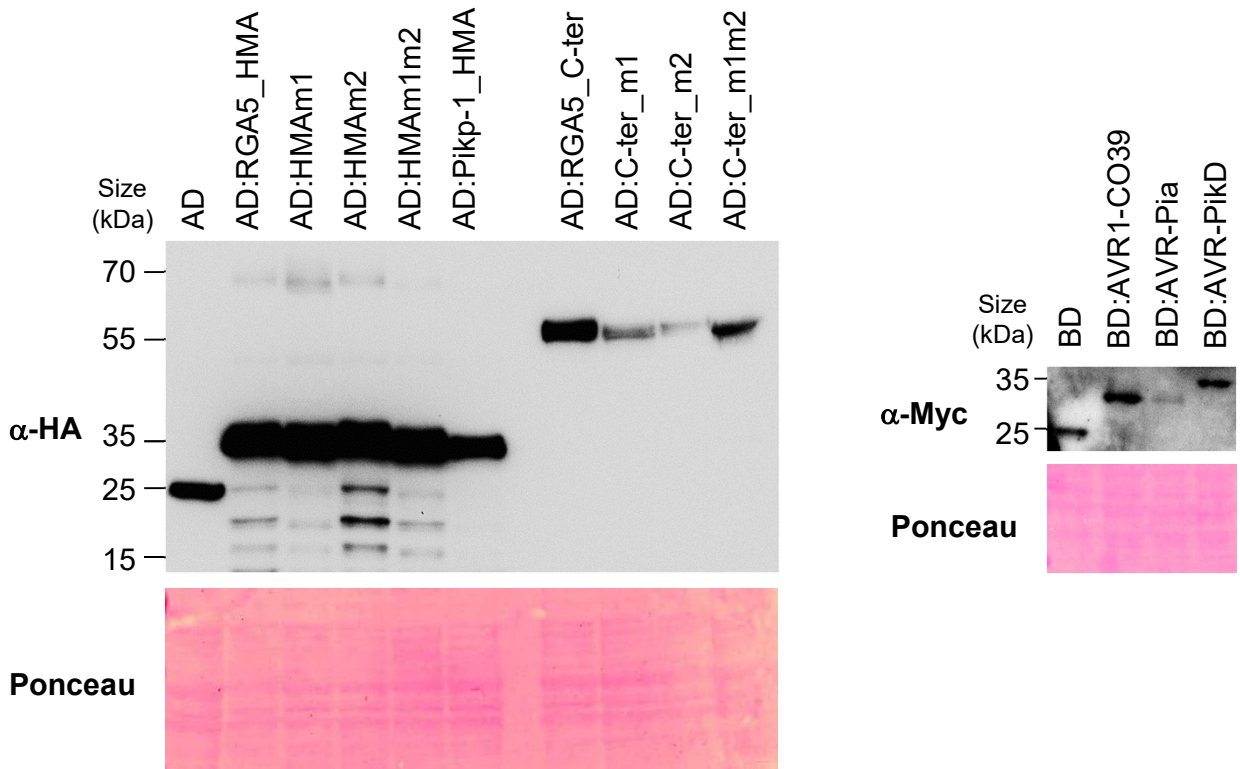

**Supplemental figure 3: Presence and integrity of chimeric proteins expressed in yeast.** Total proteins were extracted from yeasts and Myc- and HA-tagged proteins were detected by immunoblotting using anti-Myc and anti-HA antibodies, respectively.

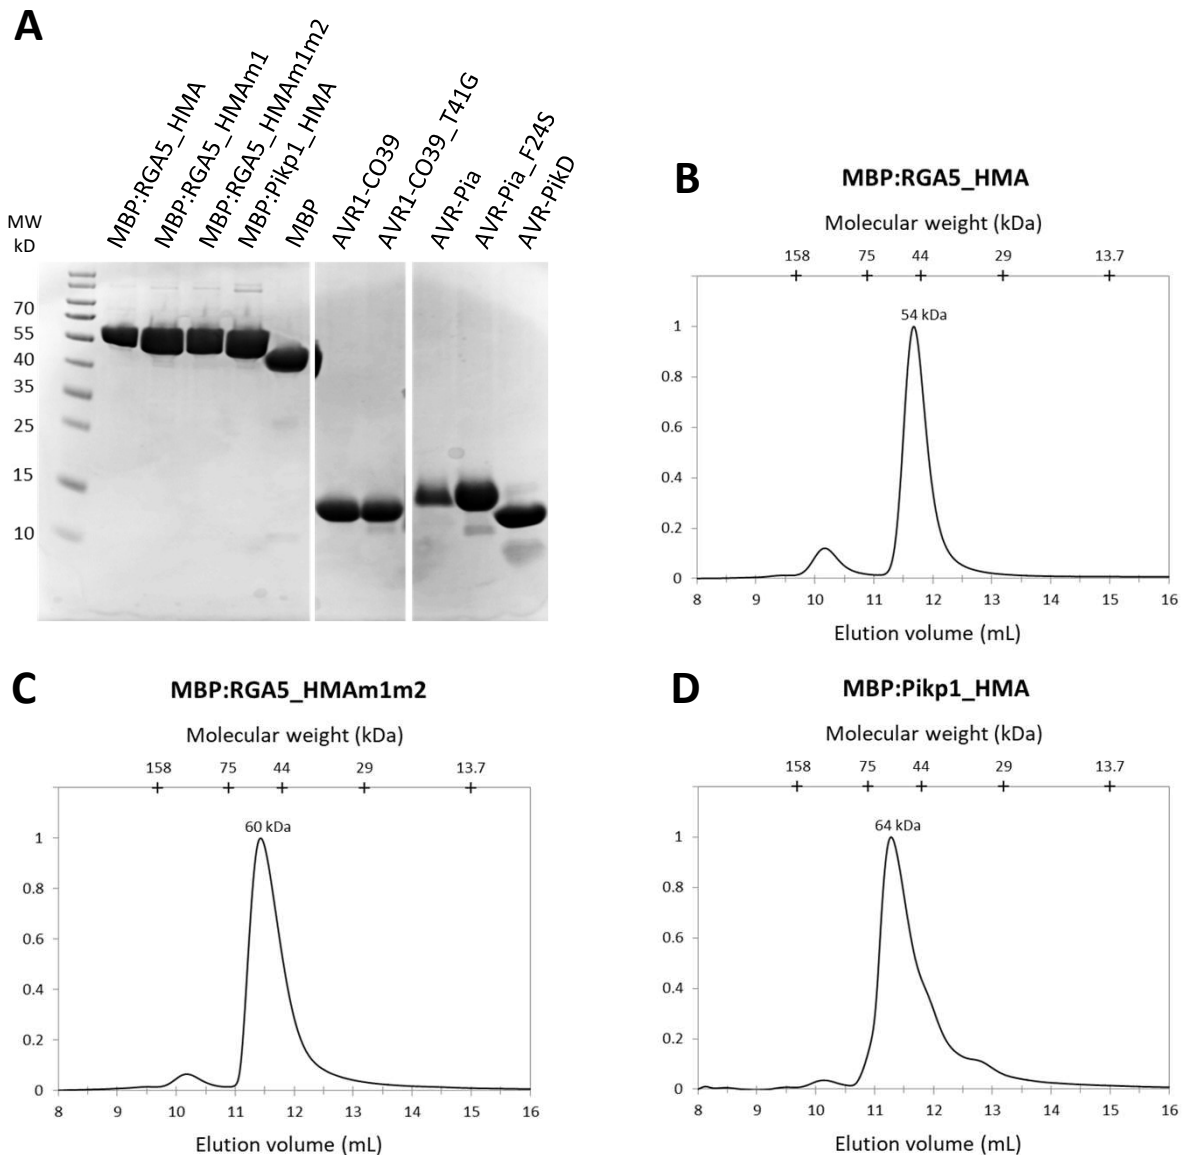

**Supplemental Figure 4: Purity and stoichiometry of recombinant proteins.** **A)** SDS-PAGE of the recombinant wild-type and mutant proteins used for SPR analysis. **(B to D)** Size exclusion chromatography (SEC) analysis of recombinant HMA domains fused to MBP. 30  $\mu$ L of the purified proteins at about 2 mg/mL were injected on gel filtration column Superdex 75 10/300 GL (Sigma) at a flow rate of 0.5 mL/min in 20 mM Tris pH 8, 150 mM NaCl and 0.5 mM DTT. Molecular weight (MW) markers (GE healthcare) were used for column calibration (upper horizontal axis) and estimation of the apparent MW of the eluted proteins. Given the theoretical MW of the MBP:HMA protein fusions (52 kDa), these proteins occur mostly as monomers. Wild-type and mutant AVR effectors have been shown to be monomeric (de Guillen et al., 2015, Guo et al., 2018), although AVR1-CO39 tends to form dimers in the absence of DTT.



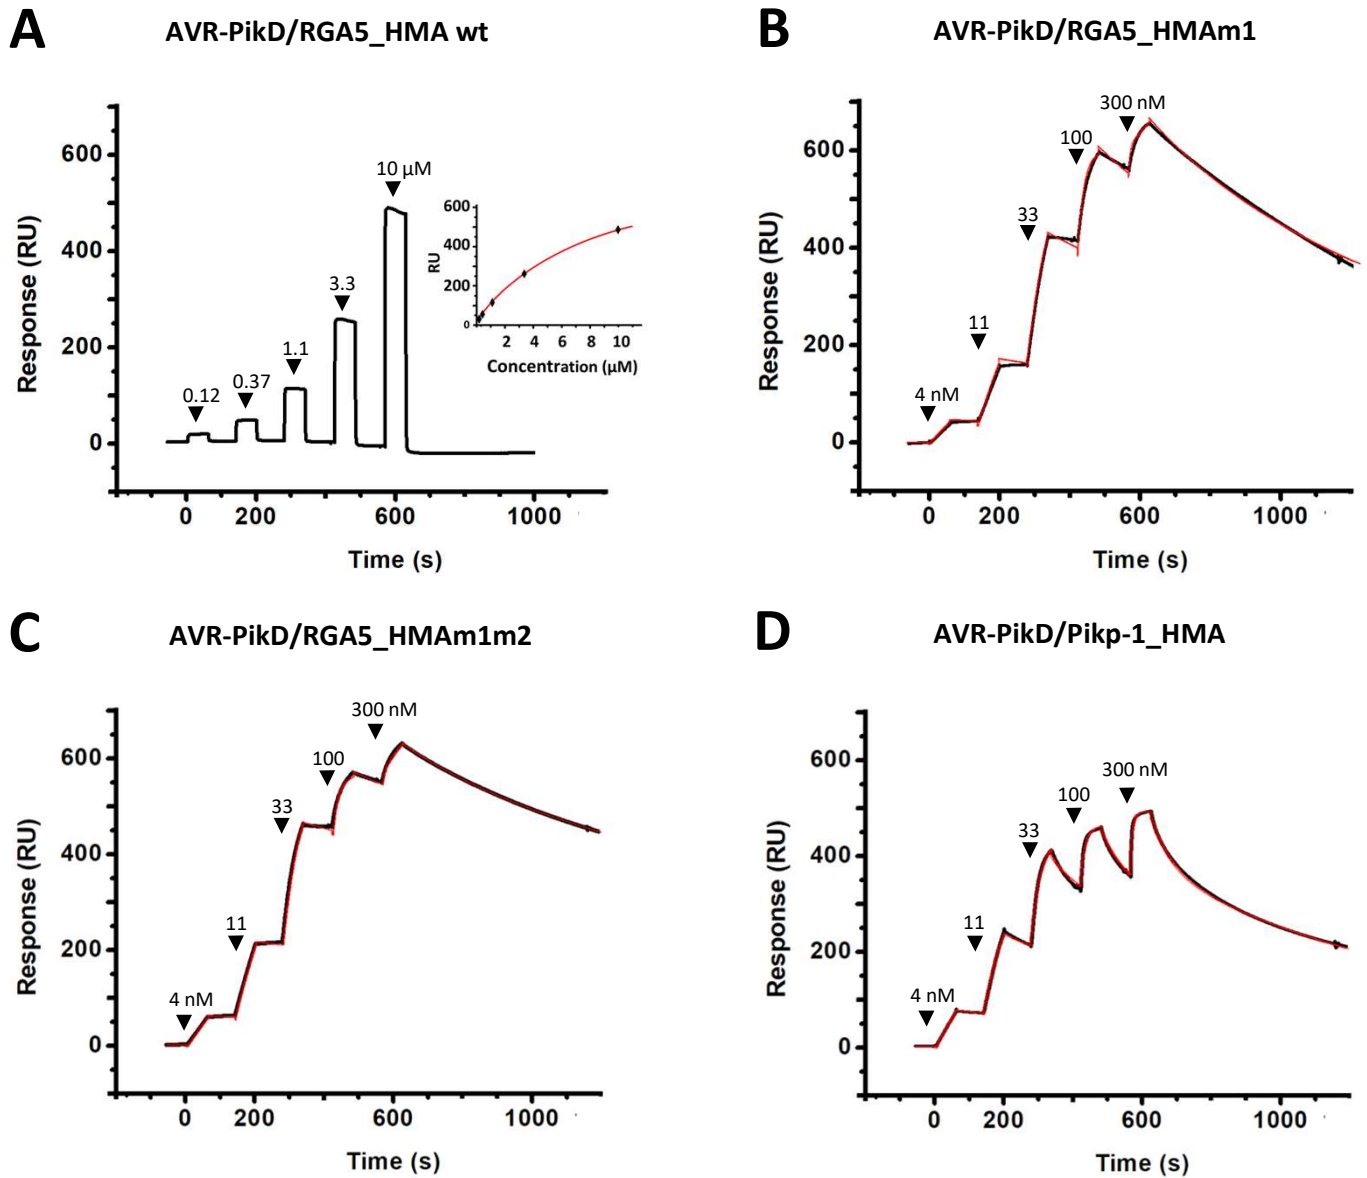

**Supplemental figure 5: Single cycle kinetic titrations with AVR-PikD to different MBP:HMAs.** The SPR sensorgrams (black curves) show the interaction of the AVR-PikD effector with the different wild-type and mutant HMA domains fused to MBP and captured by anti-MBP antibody immobilized on the chip. Black arrows indicate successive injections of AVR-PikD for 60 sec at the indicated protein concentration, followed by a dissociation phase in running buffer of 80 sec or 600 sec for the final injection. The red curves show the data fit performed by the BiaEvaluation program using a steady-state model (panel A) or a heterogeneous kinetic model (panel B-D). Binding and fitting parameters are reported in Supplemental Table 2.

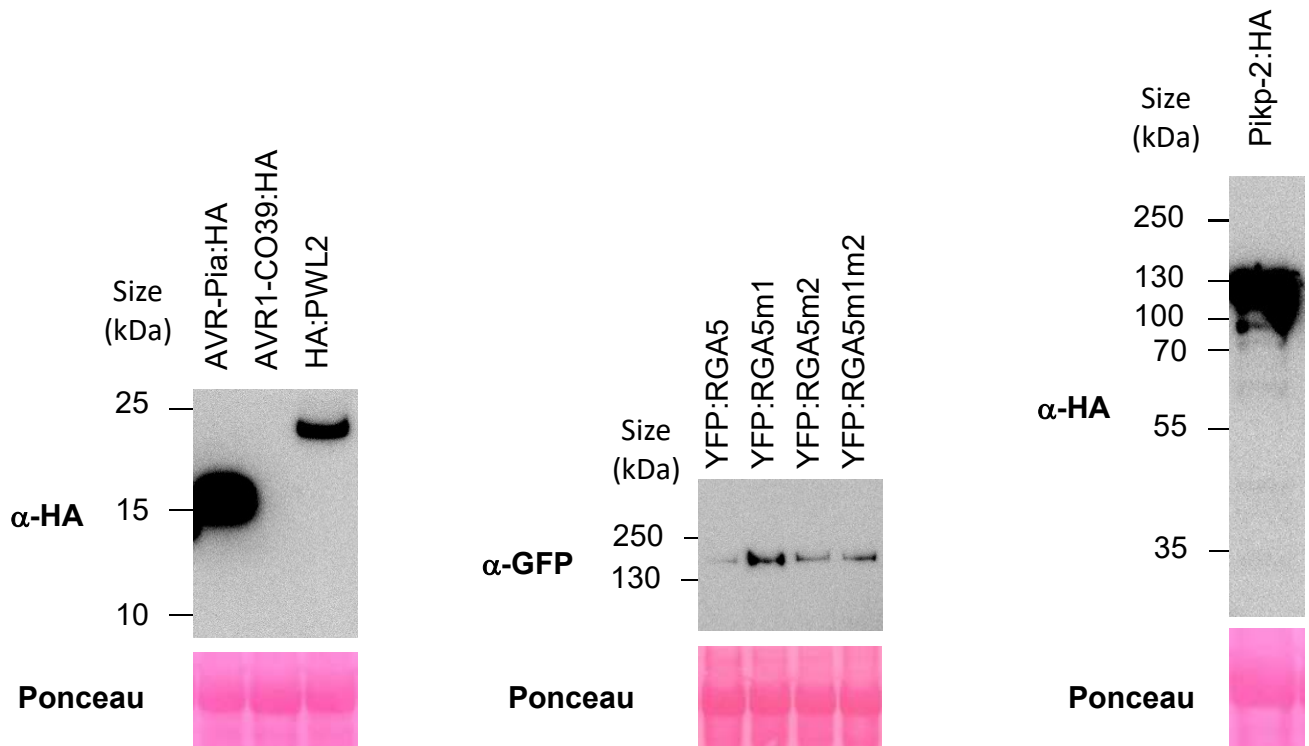

**Supplemental figure 6: Presence and integrity of proteins expressed in *N. benthamiana*.** Immunoblotting showing expression of HA- and YFP-fused proteins. Total proteins were extracted from transiently transformed *N. benthamiana* leaves 48 h after infiltration and were analyzed by immunoblotting with anti-GFP or anti-HA antibodies. Ponceau staining was used to verify equal protein loading.



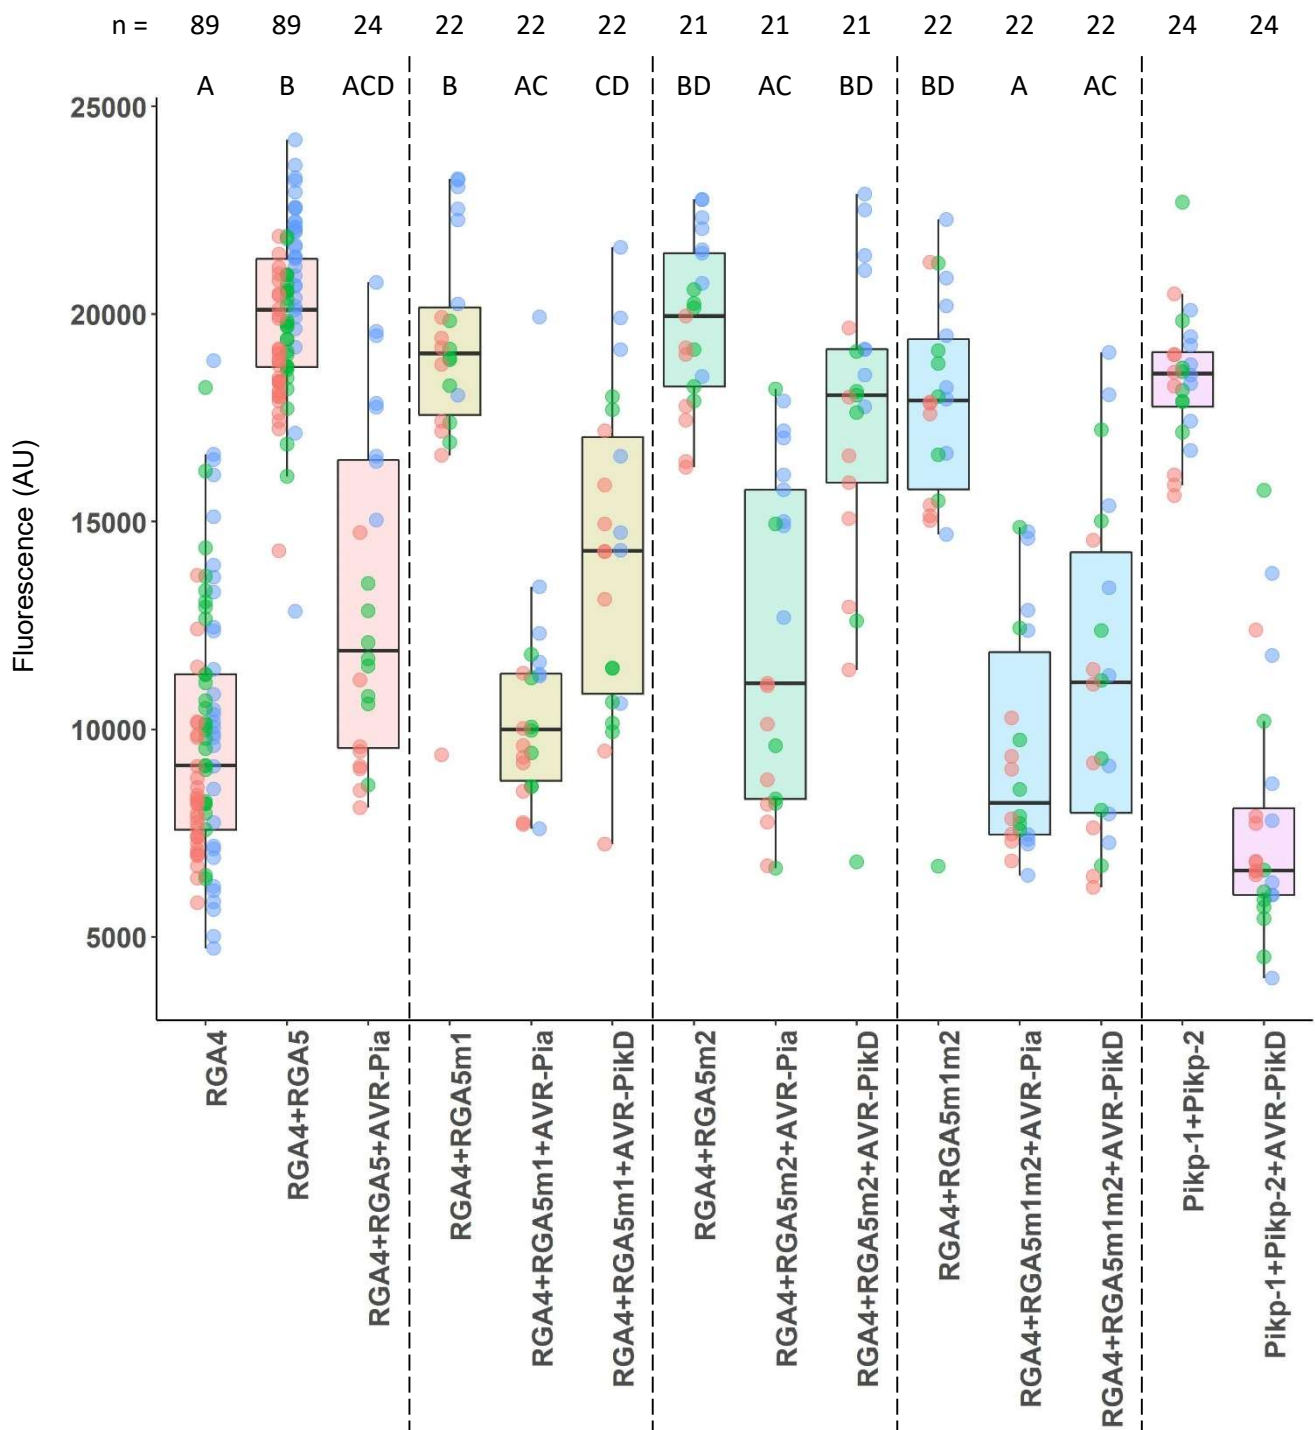

**Supplemental figure 8: Recognition of AVR-Pia and AVR-PikD by RGA5m1, m2 and m1m2.** The indicated combinations of constructs were transiently expressed in *N. benthamiana* leaves. Greyscale pictures were taken using a fluorescence scanner with settings allowing visualization of the disappearance of red fluorescence due to cell death. Therefore, cell death was quantified by measuring fluorescence levels (arbitrary unit, AU) in the infiltrated areas using ImageJ (Xi et al., 2021). Resulting data were plotted. The boxes represent the first quartile, median, and third quartile. A Kruskal Wallis test followed by a Dunn test were performed to assess difference of fluorescence levels among the various conditions. Groups with the same letter (A to D) are not significantly different at level 0.01. For each combination of constructs, all of the measurements are represented as dots with a distinct color (red, green and blue) for each of the three biological replicates. The sample size (n) for each experimental group is given.

| Constructs                           | Line | Guy11_EV                                                                              | Guy11_AVR-Pia                                                                          | JP10 (AVR-PikD)                                                                         |
|--------------------------------------|------|---------------------------------------------------------------------------------------|----------------------------------------------------------------------------------------|-----------------------------------------------------------------------------------------|
| <i>RGA4</i><br>+<br><i>RGA5</i>      | L2   |  S   |  R   |  S   |
|                                      | L5   |  S   |  R   |  S   |
|                                      | L14  |  S   |  R   |  S   |
| <i>RGA4</i><br>+<br><i>RGA5m1</i>    | L3   |  S   |  R   |  S   |
| <i>RGA4</i><br>+<br><i>RGA5m2</i>    | L1   |  S   |  R   |  S   |
|                                      | L3   |  S   |  R   |  S   |
|                                      | L5   |  S   |  R   |  S   |
| <i>RGA4</i><br>+<br><i>RGA5m1m2</i>  | L1   |  S   |  R   |  S   |
|                                      | L3   |  S   |  R   |  S   |
|                                      | L5   |  S   |  R   |  S   |
| <i>RGA4</i><br>+<br><i>GFP</i>       | L8   |  S |  S |  S |
|                                      | L10  |  S |  S |  S |
|                                      | L11  |  S |  S |  S |
| K60<br>( <i>Pikp</i> +)              | WT   |  S |  S |  R |
|                                      |      |  S |  S |  R |
|                                      |      |  S |  S |  R |
|                                      |      |  S |  S |  R |
| NB<br>( <i>pia</i> -/ <i>pikp</i> -) | WT   |  S |  S |  S |
|                                      |      |  S |  S |  S |
|                                      |      |  S |  S |  S |

**Supplemental figure 9: Inoculation of T0 transgenic plants with *M. oryzae*.** The rice cultivar Nipponbare was co-transformed with a genomic construct for *RGA4* and a genomic construct for *RGA5*, *RGA5m1*, *RGA5m2* or *RGA5m1m2*. A transgenic line carrying *RGA4* and the *GFP* was also generated as a control. T0 plants of the transgenic lines were spray inoculated with the transgenic strain Guy11-AVR-Pia or the wild-type JP10 (*AVR-PikD*+) isolate. The rice cultivar K60 carrying the *Pikp* resistance was used as a control for AVR-PikD specific recognition while Nipponbare (*pikp*-/*pia*-) served as negative control. Pictures show representative symptoms at 7 days after inoculation. Individual leaves indicate independent T1 transgenic lines (see Supplemental Table 3). S = susceptible, R = resistant.



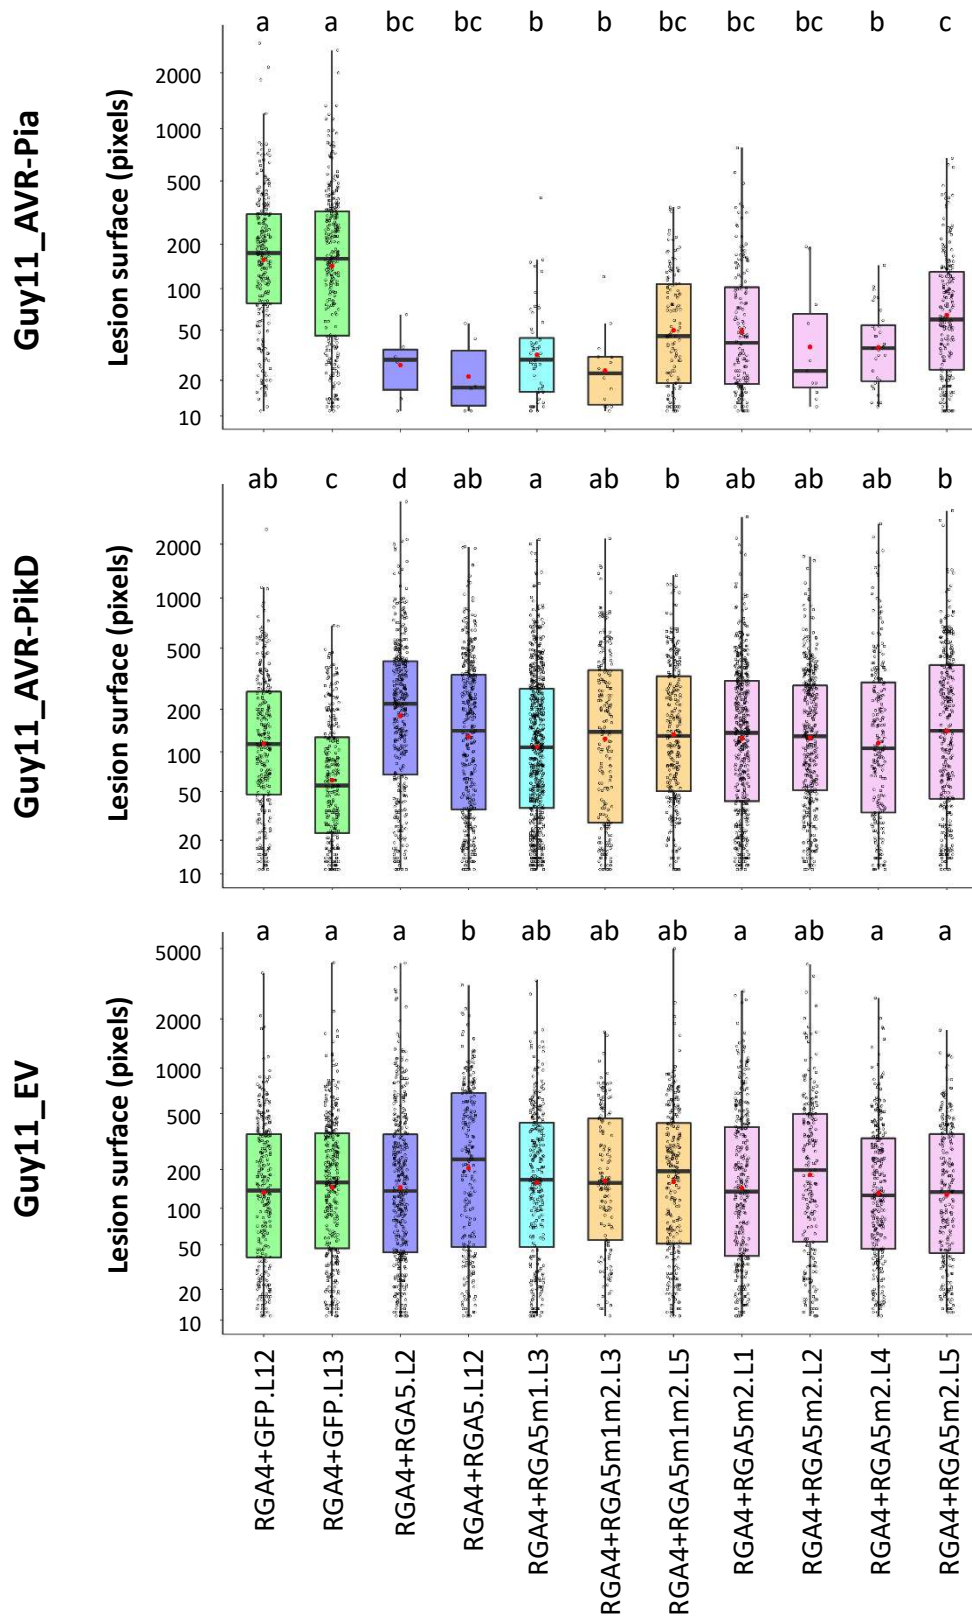

**Supplemental figure 10: Disease lesion measurements after inoculation of T2 transgenic plants.** Transgenic *M. oryzae* isolates carrying *AVR-Pia*, *AVR-PikD* or the empty vector (EV), were spray-inoculated on T2 transgenic plants carrying the indicated transgenes (i.e. *RGA4+GFP*, *RGA4+RGA5*, *RGA4+RGA5m1*, *RGA4+RGA5m1m2* or *RGA4+RGA5m2*). For each combination of transgenes, the rice transgenic lines used for inoculation are indicated (see Suppl. Table 3). Leaves from 5 to 8 different plants for each transgenic line were scanned 7 days after inoculation. Areas of disease lesions were measured using LeAFtool (<https://github.com/sravel/LeAFtool>) and plotted. The boxes represent the first quartile, median, and third quartile. Difference of lesion areas among the transgenic lines was assessed by a Kruskal-Wallis test followed by a Dunn test. For each isolate inoculated, groups with the same letter (A to C or D) are not significantly different at level 0.01.



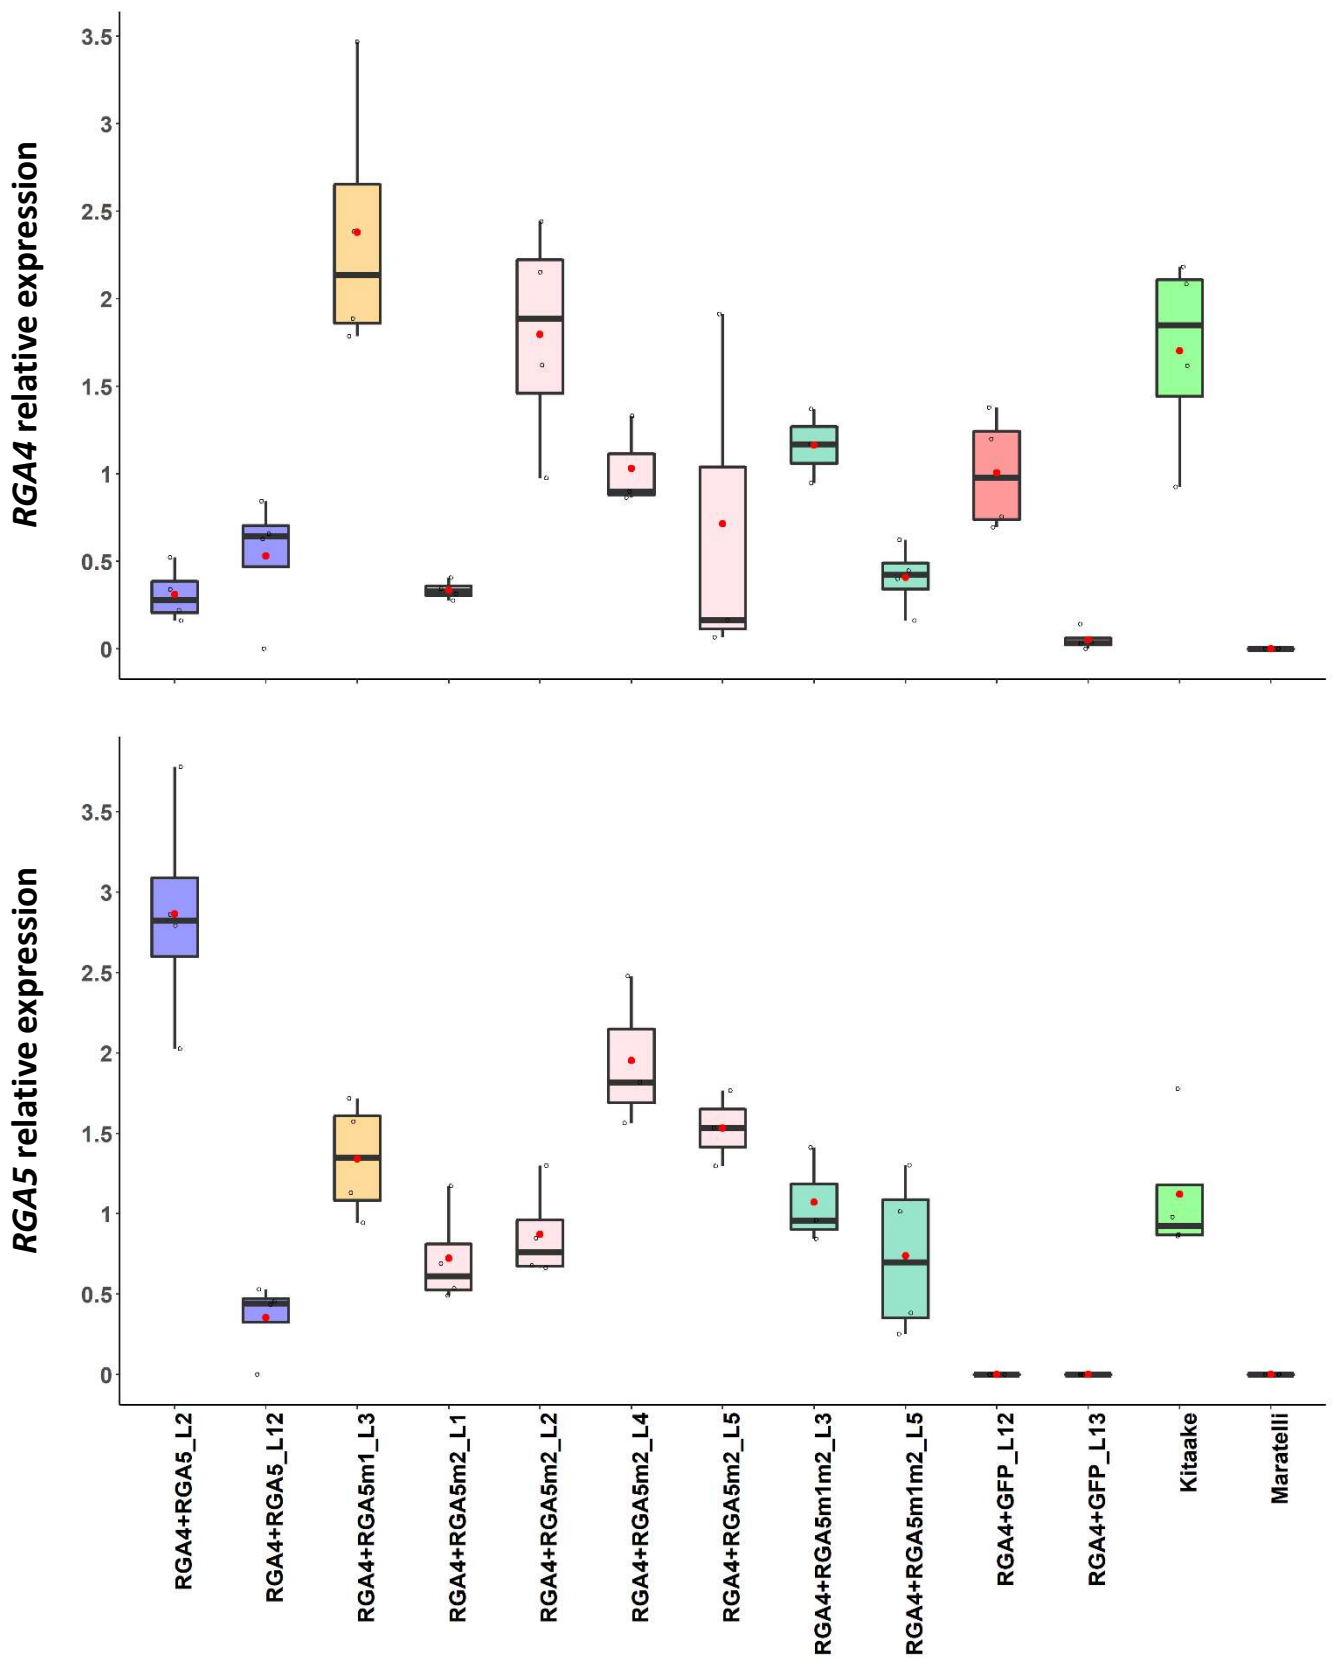

**Supplemental Figure 11: Relative expression of RGA4 and RGA5 in rice transgenic lines.** mRNA levels of *RGA4* and *RGA5* in the independent rice transgenic lines (L) and in wild type Maratelli (*pia*-) and Kitaake (*Pia*+) were determined by qRT-PCR. Relative expression levels were calculated using the constitutively expressed rice actin gene (*Os03g50890*) as a reference. Red dots indicate the mean values calculated from 3 to 4 plant pools (each pool containing RNA from 3 individual plants) for each transgenic line.



**Supplemental figure 1: 3D models of engineered RGA5\_HMAm1m2 in complex with MAX effectors.**

**A)** Sequence alignment of RGA5 and Pikip-1 HMA domains and of the engineered RGA5\_HMAm1m2. The residues constituting the binding interface in the complexes AVR1-CO39/RGA5\_HMA (PDB\_5ZNG), AVR-Pia/Pikip-1\_HMA (PDB\_6Q76) and AVR-PikD/Pikip-1\_HMA (PDB\_6G10) are highlighted respectively in pink, blue and green. The peptide fragments comprising strands  $\beta$ 2/ $\beta$ 3 and  $\beta$ 4, targeted respectively by the m1 and m2 mutations and extracted from Pikip-1\_HMA crystal structures to construct chimeric 3D models of RGA5\_HMAm1m2, are highlighted in green. **B)** Structural models of RGA5\_HMAm1m2 in complex with AVR-PikD (orange), AVR1-CO39 (blue) and AVR-Pia (cyan) are shown as cartoons (top views) or molecular surfaces (orthogonal bottom views). The different MAX effector/RGA5\_HMAm1m2 complex structures were built by replacing in PDB\_5ZNG the effector molecule and the peptide fragments containing the m1 and m2 mutations by their structural counterpart in PDB\_6G10 or PDB\_6Q76. The secondary structure elements of RGA5\_HMAm1m2 in contact with the MAX effectors are colored as in panel (A). Side chains are shown as sticks for the mutated residues in RGA5\_HMAm1m2, and for the residues replaced in the inactive effector variants AVR1-CO39\_T41G and AVR-Pia\_F24S (both highlighted in red in the bottom views) used as negative control in SPR experiments.

| BD        | AD         | DDO | TDO | TDO + 1 mM 3AT |
|-----------|------------|-----|-----|----------------|
| AVR1-CO39 | RGA5_C-ter |     |     |                |
|           | C-ter_m1m2 |     |     |                |
|           | Pikp-1_HMA |     |     |                |
| BD        | RGA5_C-ter |     |     |                |
|           | C-ter_m1m2 |     |     |                |
|           | Pikp-1_HMA |     |     |                |
| AVR1-CO39 | AD         |     |     |                |

**Supplemental figure 2: The m1m2 mutation does not abolish AVR1-CO39 binding to RGA5\_C-ter.**

Interaction of BD-fused AVR1-CO39 (without signal peptides) with the AD-fused C-terminal domains of RGA5 and RGA5m1m2 (residues 883 to 1116) was assayed by yeast two-hybrid experiments. The HMA domain of Pikp-1 (AD:Pikp-1\_HMA) and the AD and BD domains of GAL4 were used as controls. Four dilutions of diploid yeast clones (1/1, 1/10, 1/100, 1/1000) were spotted on synthetic TDO (-Trp/-Leu/-His) medium and TDO supplemented with 1 mM of 3-amino-1,2,4-triazole (3AT) to assay for interactions and on synthetic DDO (-Trp/-Leu) to monitor proper growth. Pictures were taken after 5 days of growth.



**Supplemental figure 3: Presence and integrity of chimeric proteins expressed in yeast.** Total proteins were extracted from yeasts and Myc- and HA-tagged proteins were detected by immunoblotting using anti-Myc and anti-HA antibodies, respectively. The experiment was carried out once.



**Supplemental Figure 4: Purity and stoichiometry of recombinant proteins.** **A)** SDS-PAGE of the recombinant wild-type and mutant proteins used for SPR analysis. **(B to D)** Size exclusion chromatography (SEC) analysis of recombinant HMA domains fused to MBP. 30  $\mu$ L of the purified proteins at about 2 mg/mL were injected on gel filtration column Superdex 75 10/300 GL (Sigma) at a flow rate of 0.5 mL/min in 20 mM Tris pH 8, 150 mM NaCl and 0.5 mM DTT. Molecular weight (MW) markers (GE healthcare) were used for column calibration (upper horizontal axis) and estimation of the apparent MW of the eluted proteins. Given the theoretical MW of the MBP:HMA protein fusions (52 kDa), these proteins occur mostly as monomers. Wild-type and mutant AVR effectors have been shown to be monomeric (de Guillen et al., 2015, Guo et al., 2018), although AVR1-CO39 tends to form dimers in the absence of DTT.



**Supplemental figure 5: Single cycle kinetic titrations with AVR-PikD to different MBP:HMAs.** The SPR sensorgrams (black curves) show the interaction of the AVR-PikD effector with the different wild-type and mutant HMA domains fused to MBP and captured by anti-MBP antibody immobilized on the chip. Black arrows indicate successive injections of AVR-PikD for 60 sec at the indicated protein concentration, followed by a dissociation phase in running buffer of 80 sec or 600 sec for the final injection. The red curves show the data fit performed by the BiaEvaluation program using a steady-state model (panel A) or a heterogeneous kinetic model (panel B-D). Binding and fitting parameters are reported in Supplemental Table 2.



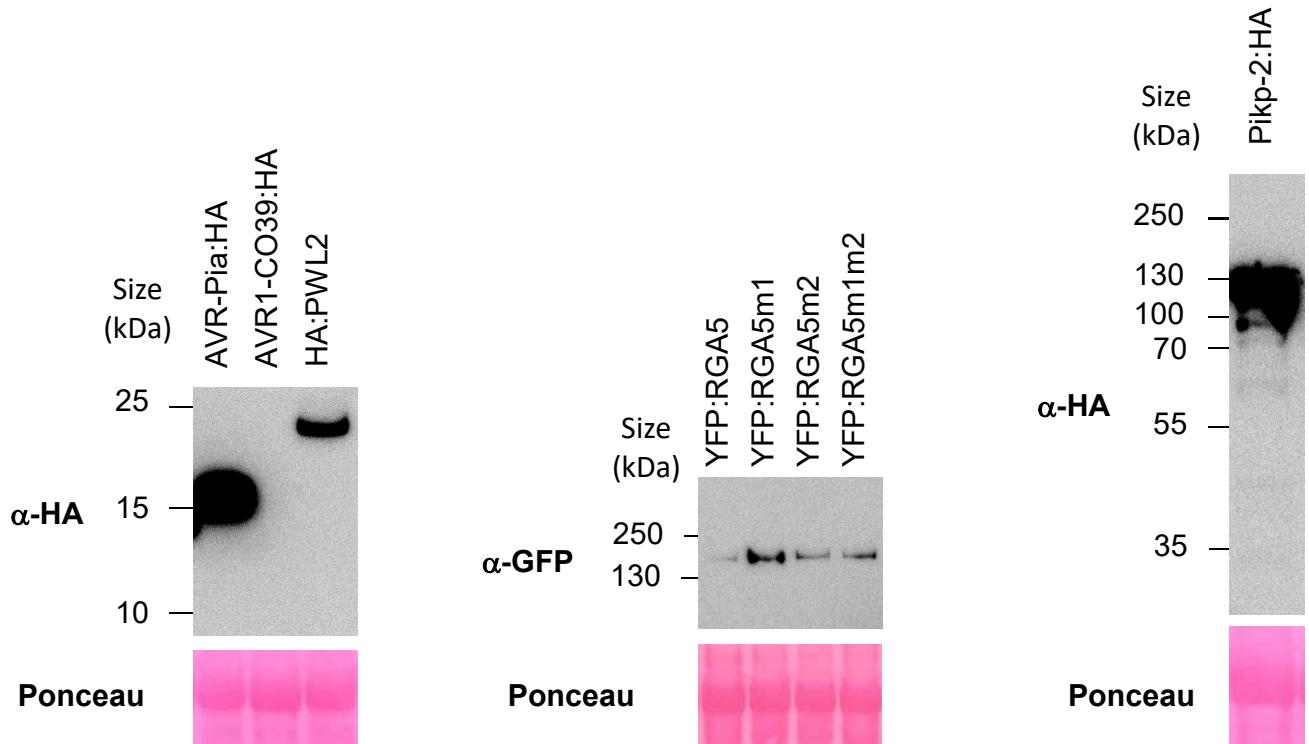

**Supplemental figure 6: Presence and integrity of proteins expressed in *N. benthamiana*.** Immunoblotting showing expression of HA- and YFP-fused proteins. Total proteins were extracted from transiently transformed *N. benthamiana* leaves 48 h after infiltration and were analyzed by immunoblotting with anti-GFP or anti-HA antibodies. Ponceau staining was used to verify equal protein loading. All immunoblots were performed once.

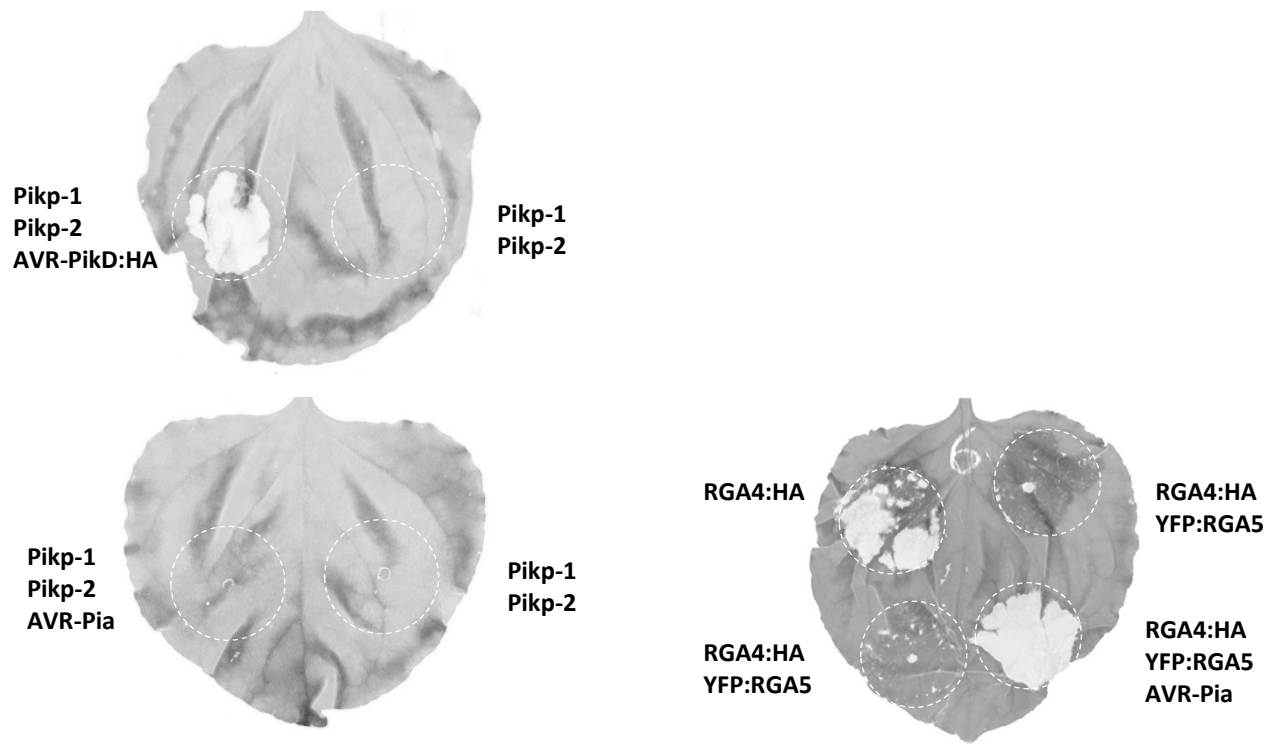

**Supplemental figure 7: AVR recognition specificity in *N. benthamiana*.** The indicated combinations of constructs were transiently expressed in *N. benthamiana* leaves. Cell death was visualized 5 days after infiltration. Greyscale pictures were taken using a fluorescence scanner with settings allowing visualization of cell death (white patches).



**Supplemental figure 8: Recognition of AVR-Pia and AVR-PikD by RGA5m1, m2 and m1m2.** The indicated combinations of constructs were transiently expressed in *N. benthamiana* leaves. Greyscale pictures were taken using a fluorescence scanner with settings allowing visualization of the disappearance of red fluorescence due to cell death. Therefore, cell death was quantified by measuring fluorescence levels (arbitrary unit, AU) in the infiltrated areas using ImageJ (Xi et al., 2021). Resulting data were plotted. The boxes represent the first quartile, median, and third quartile. A Kruskal Wallis test followed by a Dunn test were performed to assess difference of fluorescence levels among the various conditions. Groups with the same letter (A to D) are not significantly different at level 0.01. For each combination of constructs, all of the measurements are represented as dots with a distinct color (red, green and blue) for each of the three biological replicates. The sample size (n) for each experimental group is given.

| Constructs                           | Line | Guy11_EV                                                                              | Guy11_AVR-Pia                                                                          | JP10 (AVR-PikD)                                                                         |
|--------------------------------------|------|---------------------------------------------------------------------------------------|----------------------------------------------------------------------------------------|-----------------------------------------------------------------------------------------|
| <i>RGA4</i><br>+<br><i>RGA5</i>      | L2   |  S   |  R   |  S   |
|                                      | L5   |  S   |  R   |  S   |
|                                      | L14  |  S   |  R   |  S   |
| <i>RGA4</i><br>+<br><i>RGA5m1</i>    | L3   |  S   |  R   |  S   |
| <i>RGA4</i><br>+<br><i>RGA5m2</i>    | L1   |  S   |  R   |  S   |
|                                      | L3   |  S   |  R   |  S   |
|                                      | L5   |  S   |  R   |  S   |
| <i>RGA4</i><br>+<br><i>RGA5m1m2</i>  | L1   |  S   |  R   |  S   |
|                                      | L3   |  S   |  R   |  S   |
|                                      | L5   |  S   |  R   |  S   |
| <i>RGA4</i><br>+<br><i>GFP</i>       | L8   |  S |  S |  S |
|                                      | L10  |  S |  S |  S |
|                                      | L11  |  S |  S |  S |
| K60<br>( <i>Pikp</i> +)              | WT   |  S |  S |  R |
|                                      |      |  S |  S |  R |
|                                      |      |  S |  S |  R |
|                                      |      |  S |  S |  R |
| NB<br>( <i>pia</i> -/ <i>pikp</i> -) | WT   |  S |  S |  S |
|                                      |      |  S |  S |  S |
|                                      |      |  S |  S |  S |

**Supplemental figure 9: Inoculation of T0 transgenic plants with *M. oryzae*.** The rice cultivar Nipponbare was co-transformed with a genomic construct for *RGA4* and a genomic construct for *RGA5*, *RGA5m1*, *RGA5m2* or *RGA5m1m2*. A transgenic line carrying *RGA4* and the *GFP* was also generated as a control. T0 plants of the transgenic lines were spray inoculated with the transgenic strain Guy11-AVR-Pia or the wild-type JP10 (*AVR-PikD*+) isolate. The rice cultivar K60 carrying the *Pikp* resistance was used as a control for AVR-PikD specific recognition while Nipponbare (*pikp*-/*pia*-) served as negative control. Pictures show representative symptoms at 7 days after inoculation. Individual leaves indicate independent T1 transgenic lines (see Supplemental Table 3). S = susceptible, R = resistant.

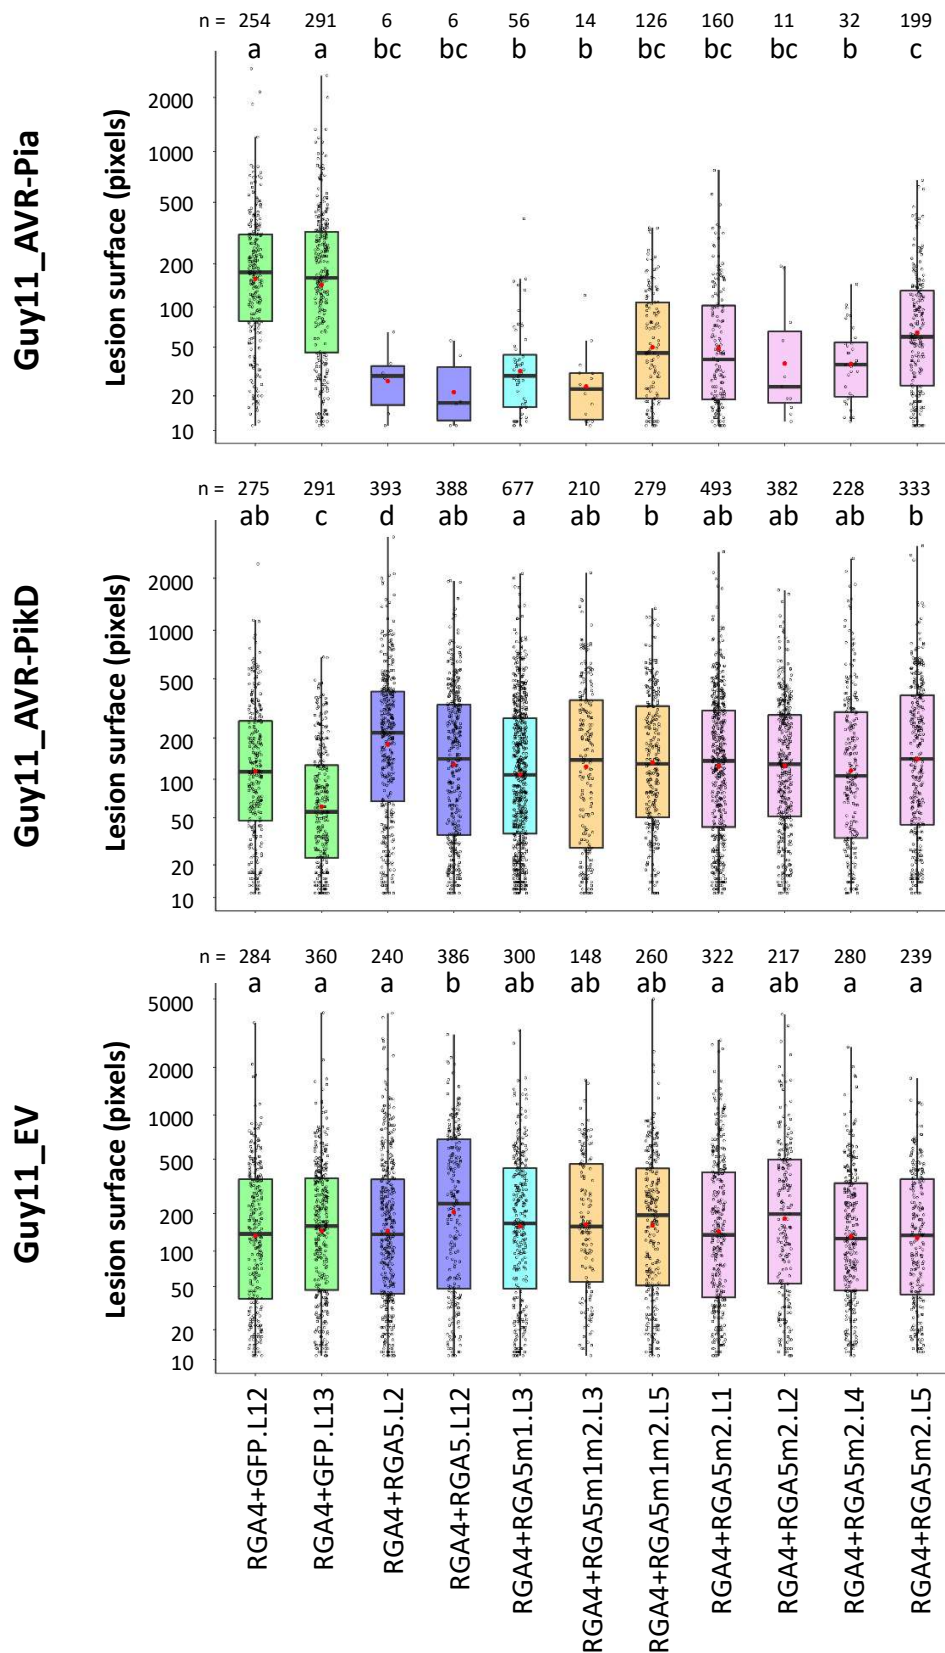

**Supplemental figure 10: Disease lesion measurements after inoculation of T2 transgenic plants.** Transgenic *M. oryzae* isolates carrying *AVR-Pia*, *AVR-PikD* or the empty vector (EV), were spray-inoculated on T2 transgenic plants carrying the indicated transgenes (i.e. *RGA4+GFP*, *RGA4+RGA5*, *RGA4+RGA5m1*, *RGA4+RGA5m1m2* or *RGA4+RGA5m2*). For each combination of transgenes, the rice transgenic lines used for inoculation are indicated (see Suppl. Table 3). Leaves from 5 to 8 different plants for each transgenic line were scanned 7 days after inoculation. Areas of disease lesions were measured using LeAFtool (<https://github.com/sravel/LeAFtool>) and plotted. The boxes represent the first quartile, median, and third quartile. Red dots indicate the mean values. Difference of lesion areas among the transgenic lines was assessed by a Kruskal-Wallis test followed by a Dunn test. For each isolate inoculated, groups with the same letter (A to C or D) are not significantly different at level 0.01. n indicates the total number of lesions measured for each rice transgenic line over one experiment.



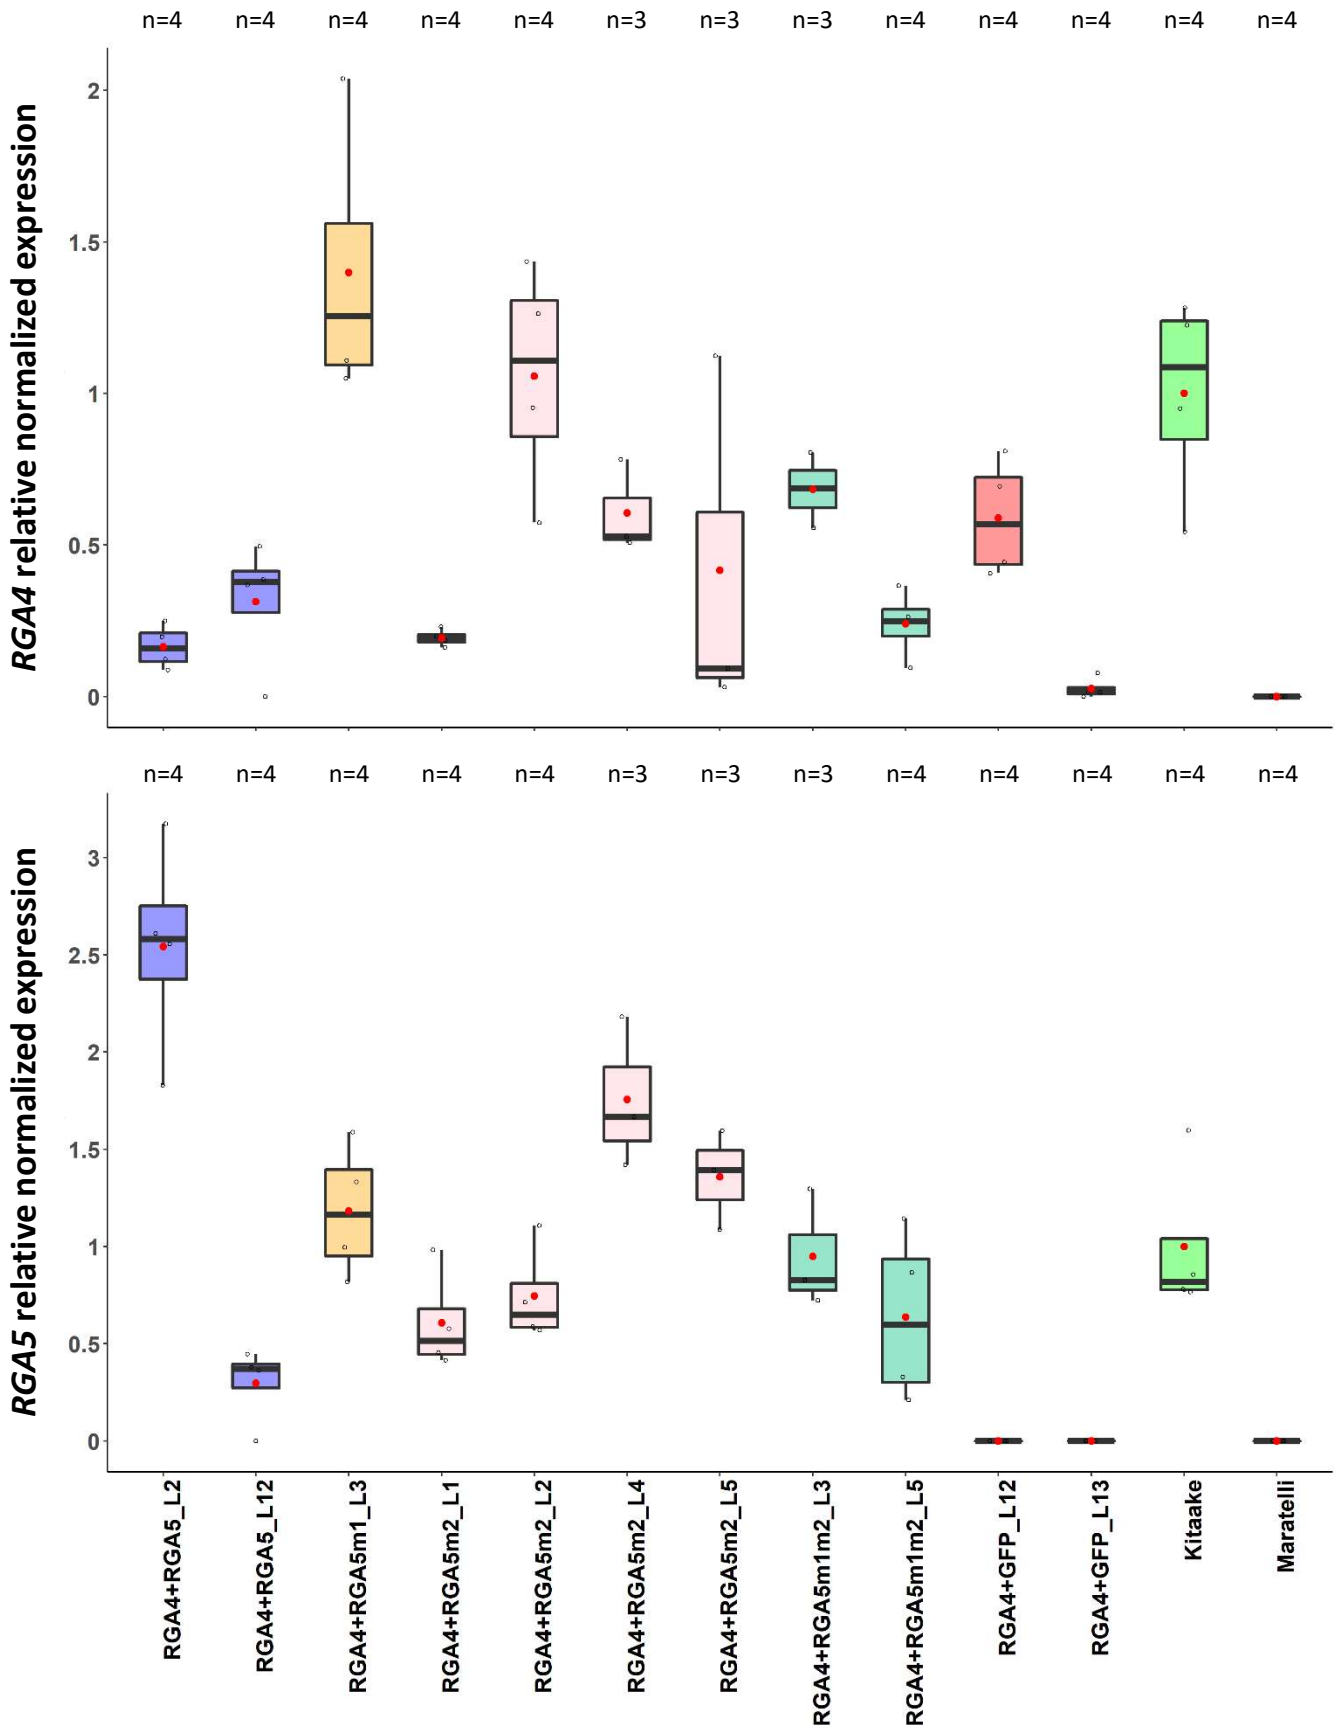

**Supplemental Figure 11: Relative normalized expression of *RGA4* and *RGA5* in rice transgenic lines.** mRNA levels of *RGA4* and *RGA5* in the independent rice transgenic lines (L) and in wild type Maratelli (*pia*-) and Kitaake (*Pia*+) were determined by qRT-PCR. Relative expression levels were calculated using the constitutively expressed rice actin gene (*Os03g50890*) as a reference. Relative expression of *RGA4* and *RGA5* in each transgenic line was normalized relative to the mean expression level of each gene in Kitaake. The boxes represent the first quartile, median, and third quartile. Red dots indicate the mean values calculated from n=3 or n=4 biologically independent plant pools (each pool containing RNA from 3 individual plants) for each transgenic line.



**Supplemental table 1: Summary of QtPISA analysis of the minimized X-ray and model structures of MAX/HMA complexes**

| Complex                                  | BE cal.mol <sup>-1</sup> | $\Delta$ iG kcal.mol <sup>-1</sup> | Total interface area Å <sup>2</sup> | No. of H-Bonds | No. of Salt Bridges |
|------------------------------------------|--------------------------|------------------------------------|-------------------------------------|----------------|---------------------|
| <b>AVR1-CO39/RGA5_HMA</b><br>(PDB 5ZNG)  | -6.5(-7.3)               | -3.0(-4.6)                         | 499.0(492.8)                        | 7(6)           | 1(0)                |
| <b>AVR-Pia/Pikp-1_HMA</b><br>(PDB 6Q76)  | -8.9(-8.6)               | -4.6(-4.7)                         | 491.6(460.7)                        | 7(7)           | 3(2)                |
| <b>AVR-PiKD/Pikp-1_HMA</b><br>(PDB 6G10) | -10.3(-10.8)             | -2.1(-2.2)                         | 1106.6(979.3)                       | 11(10)         | 9(11)               |
| <b>AVR-Pia/RGA5_HMA</b>                  | -7.2                     | -4.3                               | 488.0                               | 4              | 3                   |
| <b>AVR-Pia/HMAm1m2</b>                   | -8.6                     | -4.3                               | 481.4                               | 8              | 2                   |
| <b>AVR1-CO39/HMAm1m2</b>                 | -6.8                     | -3.4                               | 482.8                               | 6              | 2                   |
| <b>AVR-PikD/HMAm1m2</b>                  | -11.3                    | -2.2                               | 1052.1                              | 13             | 9                   |

As controls, the three PDB structures (5ZNG, 6Q76 and 6G10) used as templates for modelling HMA domains in complex with MAX effectors were minimized with Charmm and analysed with QtPISA. The values given between parenthesis correspond to the initial PDB structures without minimization. In the bottom section, five models of MAX/HMA complexes generated as described in the Methods were refined with Charmm and analysed with QtPISA. BE is the total Binding Energy at the interaction interface and  $\Delta$ iG is the solvation energy gain. The number of H-bonds and salt-bridges formed at the complex interface are also indicated.

**Supplemental Table 2: Binding and fitting parameters of AVR-PikD interaction with different HMA domains, calculated for the kinetic titrations shown in supplementary Figure 4 using the indicated interaction model for fitting SPR data.**

| <b>Steady-state model</b>  | <b><math>K_D</math> (M)</b>    | <b><math>R_{max}</math> (RU)</b>  | <b><math>\chi^2</math> (RU<sup>2</sup>)</b> |                                |                                   |                                  |                                   |                                   |                                             |
|----------------------------|--------------------------------|-----------------------------------|---------------------------------------------|--------------------------------|-----------------------------------|----------------------------------|-----------------------------------|-----------------------------------|---------------------------------------------|
| AVR-PikD/RGA5_HMA wt       | <b>8.32E-06</b>                | 861                               | 9.51                                        |                                |                                   |                                  |                                   |                                   |                                             |
| <b>Heterogeneous model</b> | <b><math>K_{D1}</math> (M)</b> | <b><math>k_{a1}</math> (1/Ms)</b> | <b><math>k_{d1}</math> (1/s)</b>            | <b><math>K_{D2}</math> (M)</b> | <b><math>k_{a2}</math> (1/Ms)</b> | <b><math>k_{d2}</math> (1/s)</b> | <b><math>R_{max1}</math> (RU)</b> | <b><math>R_{max2}</math> (RU)</b> | <b><math>\chi^2</math> (RU<sup>2</sup>)</b> |
| AVR-PikD/RGA5_HMAm1        | <b>1.60E-09</b>                | 7.30E+05                          | 1.17E-03                                    | 2.90E-07                       | 6.66E+03                          | 1.93E-03                         | 598                               | 521                               | 29.4                                        |
| AVR-PikD/RGA5_HMAm1m2      | <b>5.38E-10</b>                | 8.36E+05                          | 4.50E-04                                    | 3.60E-07                       | 8.61E+03                          | 3.10E-03                         | 549                               | 517                               | 3.98                                        |
| AVR-PikD/Pikp-1_HMA        | <b>8.30E-10</b>                | 1.43E+06                          | 1.19E-03                                    | 4.44E-08                       | 3.84E+05                          | 1.71E-02                         | 372                               | 119                               | 11.9                                        |

| Rice cultivar           | Genes transformed | Independent transgenic line | Genotype RGA4 (T0) | Genotype RGA5 (T0) | Sequencing RGA5 PCR products (T0) | Phenotype T0 Guy11_EV | Phenotype T0 Guy11_AVR-Pia | Phenotype T0 JP10 (AVR-PikD+) | T0 seed production | Phenotype T1 Guy11_EV | Phenotype T1 Guy11_AVR-Pia | Phenotype T1 Guy11_AVR1-CO39 | Phenotype T1 Guy11_AVR-PikD | Phenotype T2 Guy11_AVR-Pia | Phenotype T2 Guy11_AVR1-CO39 | Phenotype T2 Guy11_AVR-PikD |    |
|-------------------------|-------------------|-----------------------------|--------------------|--------------------|-----------------------------------|-----------------------|----------------------------|-------------------------------|--------------------|-----------------------|----------------------------|------------------------------|-----------------------------|----------------------------|------------------------------|-----------------------------|----|
| Nipponbare (pia-/pikp-) | RGA4+RGA5         | L1                          | +                  | +                  | +                                 | S                     | S                          | S                             | 20                 | nt                    | nt                         | nt                           | nt                          | nt                         | nt                           | nt                          |    |
|                         |                   | L2                          | +                  | +                  | nt                                | S                     | R                          | S                             | >100               | S                     | R                          | R                            | S                           | R                          | R                            | S                           |    |
|                         |                   | L3                          | +                  | +                  | +                                 | nt                    | nt                         | nt                            | ~50                | nt                    | nt                         | nt                           | nt                          | nt                         | nt                           | nt                          | nt |
|                         |                   | lacking RGA5                | +                  | -                  | nt                                | nt                    | nt                         | nt                            | >100               | nt                    | nt                         | nt                           | nt                          | nt                         | nt                           | nt                          | nt |
|                         |                   | L4                          | +                  | +                  | +                                 | S                     | nt                         | S                             | 5                  | nt                    | nt                         | nt                           | nt                          | nt                         | nt                           | nt                          | nt |
|                         |                   | L5                          | +                  | +                  | +                                 | S                     | R                          | S                             | ~50                | S                     | R                          | R                            | S                           | nt                         | nt                           | nt                          | nt |
|                         |                   | L6                          | +                  | +                  | nt                                | S                     | nt                         | S                             | >100               | nt                    | nt                         | nt                           | nt                          | nt                         | nt                           | nt                          | nt |
|                         |                   | L7                          | +                  | +                  | +                                 | nt                    | nt                         | nt                            | 10                 | nt                    | nt                         | nt                           | nt                          | nt                         | nt                           | nt                          | nt |
|                         |                   | lacking RGA5                | +                  | -                  | nt                                | nt                    | nt                         | S                             | >100               | nt                    | nt                         | nt                           | nt                          | nt                         | nt                           | nt                          | nt |
|                         |                   | L8                          | +                  | +                  | nt                                | S                     | S                          | S                             | >100               | nt                    | nt                         | nt                           | nt                          | nt                         | nt                           | nt                          | nt |
|                         |                   | L9                          | +                  | +                  | nt                                | nt                    | R                          | nt                            | 0                  | nt                    | nt                         | nt                           | nt                          | nt                         | nt                           | nt                          | nt |
|                         |                   | L10                         | +                  | +                  | nt                                | S                     | R                          | nt                            | 0                  | nt                    | nt                         | nt                           | nt                          | nt                         | nt                           | nt                          | nt |
|                         |                   | L11                         | +                  | +                  | nt                                | nt                    | R                          | nt                            | 0                  | nt                    | nt                         | nt                           | nt                          | nt                         | nt                           | nt                          | nt |
|                         |                   | L12                         | +                  | +                  | nt                                | S                     | R                          | nt                            | >100               | S                     | R                          | R                            | S                           | R                          | R                            | S                           |    |
| L13                     | +                 | +                           | nt                 | nt                 | nt                                | nt                    | 0                          | nt                            | nt                 | nt                    | nt                         | nt                           | nt                          | nt                         | nt                           |                             |    |
| L14                     | +                 | +                           | nt                 | S                  | R                                 | S                     | 10                         | nt                            | nt                 | nt                    | nt                         | nt                           | nt                          | nt                         | nt                           |                             |    |
| Nipponbare (pia-/pikp-) | RGA4+RGA5m1       | L1                          | +                  | +                  | +                                 | S                     | nt                         | S                             | >100               | S                     | R                          | R                            | S                           | nt                         | nt                           | nt                          |    |
|                         |                   | L2                          | +                  | +                  | +                                 | S                     | S                          | S                             | >100               | nt                    | nt                         | nt                           | nt                          | nt                         | nt                           | nt                          |    |
|                         |                   | L3                          | +                  | +                  | +                                 | S                     | R                          | S                             | ~50                | S                     | R                          | R                            | S                           | R                          | R                            | S                           |    |
|                         |                   | L4                          | +                  | +                  | +                                 | nt                    | nt                         | nt                            | 0                  | nt                    | nt                         | nt                           | nt                          | nt                         | nt                           | nt                          |    |
|                         |                   | L5                          | +                  | +                  | +                                 | nt                    | nt                         | nt                            | 0                  | nt                    | nt                         | nt                           | nt                          | nt                         | nt                           | nt                          |    |
|                         |                   | L6                          | +                  | +                  | +                                 | nt                    | nt                         | nt                            | 0                  | nt                    | nt                         | nt                           | nt                          | nt                         | nt                           | nt                          |    |
| Nipponbare (pia-/pikp-) | RGA4+RGA5m2       | L1                          | +                  | +                  | +                                 | S                     | R                          | S                             | >100               | S                     | R                          | R                            | S                           | R                          | R                            | S                           |    |
|                         |                   | L2                          | +                  | +                  | +                                 | nt                    | nt                         | nt                            | >100               | nt                    | nt                         | nt                           | nt                          | R                          | R                            | S                           |    |
|                         |                   | L3                          | +                  | +                  | +                                 | S                     | R                          | S                             | 9                  | nt                    | nt                         | nt                           | nt                          | nt                         | nt                           | nt                          |    |
|                         |                   | L4                          | +                  | +                  | +                                 | nt                    | nt                         | nt                            | >100               | S                     | R                          | R                            | S                           | R                          | R                            | S                           |    |
|                         |                   | L5                          | +                  | +                  | +                                 | S                     | R                          | S                             | ~50                | S                     | R                          | 1 dwarf plant                | S                           | R                          | R                            | S                           |    |
| Nipponbare (pia-/pikp-) | RGA4+RGA5m1m2     | L1                          | +                  | +                  | +                                 | S                     | R                          | S                             | 0                  | nt                    | nt                         | nt                           | nt                          | nt                         | nt                           | nt                          |    |
|                         |                   | L2                          | +                  | +                  | +                                 | nt                    | nt                         | nt                            | 0                  | nt                    | nt                         | nt                           | nt                          | nt                         | nt                           | nt                          |    |
|                         |                   | L3                          | +                  | +                  | +                                 | S                     | R                          | S                             | ~50                | S                     | R                          | R                            | S                           | R                          | R                            | S                           |    |
|                         |                   | L4                          | +                  | +                  | +                                 | S                     | S                          | S                             | ~50                | nt                    | nt                         | nt                           | nt                          | nt                         | nt                           | nt                          |    |
|                         |                   | L5                          | +                  | +                  | +                                 | nt                    | R                          | S                             | 4                  | nt                    | nt                         | nt                           | nt                          | R                          | R                            | S                           |    |
|                         |                   | L6                          | +                  | +                  | +                                 | S                     | S                          | S                             | ~50                | nt                    | nt                         | nt                           | nt                          | nt                         | nt                           | nt                          |    |
| Nipponbare (pia-/pikp-) | RGA4+GFP          | L1                          | +                  | -                  | nt                                | nt                    | nt                         | nt                            | 10                 | nt                    | nt                         | nt                           | nt                          | nt                         | nt                           | nt                          |    |
|                         |                   | L2                          | +                  | -                  | nt                                | nt                    | nt                         | nt                            | 10                 | nt                    | nt                         | nt                           | nt                          | nt                         | nt                           | nt                          |    |
|                         |                   | L3                          | +                  | -                  | nt                                | nt                    | nt                         | nt                            | 10                 | nt                    | nt                         | nt                           | nt                          | nt                         | nt                           | nt                          |    |
|                         |                   | L4                          | +                  | -                  | nt                                | nt                    | nt                         | nt                            | 0                  | nt                    | nt                         | nt                           | nt                          | nt                         | nt                           | nt                          |    |
|                         |                   | L5                          | +                  | -                  | nt                                | nt                    | nt                         | nt                            | 0                  | nt                    | nt                         | nt                           | nt                          | nt                         | nt                           | nt                          |    |
|                         |                   | L6                          | +                  | -                  | nt                                | S                     | S                          | S                             | 20                 | nt                    | nt                         | nt                           | nt                          | nt                         | nt                           | nt                          |    |
|                         |                   | L7                          | +                  | -                  | nt                                | nt                    | nt                         | nt                            | 10                 | nt                    | nt                         | nt                           | nt                          | nt                         | nt                           | nt                          |    |
|                         |                   | L8                          | +                  | -                  | nt                                | S                     | S                          | S                             | >100               | nt                    | nt                         | nt                           | nt                          | nt                         | nt                           | nt                          |    |
|                         |                   | L9                          | +                  | -                  | nt                                | nt                    | nt                         | nt                            | 0                  | nt                    | nt                         | nt                           | nt                          | nt                         | nt                           | nt                          |    |
|                         |                   | L10                         | +                  | -                  | nt                                | S                     | S                          | S                             | >100               | nt                    | nt                         | nt                           | nt                          | nt                         | nt                           | nt                          |    |
|                         |                   | L11                         | +                  | -                  | nt                                | S                     | S                          | S                             | 4                  | nt                    | nt                         | nt                           | nt                          | nt                         | nt                           | nt                          |    |
|                         |                   | lacking RGA4                | -                  | -                  | nt                                | nt                    | nt                         | nt                            | >100               | nt                    | nt                         | nt                           | nt                          | nt                         | nt                           | nt                          |    |
|                         |                   | L12                         | +                  | -                  | nt                                | S                     | S                          | S                             | >100               | S                     | S                          | S                            | S                           | S                          | S                            | S                           |    |
|                         |                   | lacking RGA4                | -                  | -                  | nt                                | S                     | S                          | S                             | >100               | nt                    | nt                         | nt                           | nt                          | nt                         | nt                           | nt                          |    |
| L13                     | +                 | -                           | nt                 | nt                 | nt                                | nt                    | >100                       | S                             | S                  | S                     | S                          | S                            | S                           | S                          |                              |                             |    |
| L14                     | +                 | -                           | nt                 | nt                 | nt                                | nt                    | >100                       | S                             | S                  | S                     | S                          | nt                           | nt                          | nt                         |                              |                             |    |
| K60 (pia-/Pikp+)        | /                 | /                           | /                  | /                  | /                                 | I                     | I                          | R                             | /                  | S                     | S                          | S                            | R                           | S                          | R                            |                             |    |
| Nipponbare (pia-/pikp-) | /                 | /                           | /                  | /                  | /                                 | S                     | S                          | S                             | /                  | S                     | S                          | S                            | S                           | S                          | S                            |                             |    |
| Maratelli (pia-/pikp-)  | /                 | /                           | /                  | /                  | /                                 | S                     | S                          | S                             | /                  | S                     | S                          | S                            | S                           | S                          | S                            |                             |    |
| Kanto 51 (pia-/Pik+)    | /                 | /                           | /                  | /                  | /                                 | S                     | S                          | R                             | /                  | nt                    | nt                         | nt                           | nt                          | nt                         | nt                           |                             |    |
| Tsuyuake (pia-/Pikm+)   | /                 | /                           | /                  | /                  | /                                 | S                     | S                          | R                             | /                  | nt                    | nt                         | nt                           | nt                          | nt                         | nt                           |                             |    |
| Kitaake (Pia+/Pikp+)    | /                 | /                           | /                  | /                  | /                                 | S                     | R                          | R                             | /                  | nt                    | nt                         | nt                           | nt                          | nt                         | nt                           |                             |    |

Supplemental Table 3: Inoculation experiments on T0, T1 and T2 rice transgenic plants. S = susceptible; R = resistant; I = intermediate resistance; nt = not tested.

**Supplemental Table 4: Primers**

| <b>Primers</b> | <b>Sequence</b>                                                            |
|----------------|----------------------------------------------------------------------------|
| oCS080         | GGGGACCACTTTGTACAAGAAAGCTGGGTCTCACATGGTTGAGCAAGGGTTAA                      |
| oCS108         | GGGGACAAGTTTGTACAAAAAAGCAGGCTTAATGGGTGGCGGGTGGACTAACAA                     |
| oCS109         | GGGGACCACTTTGTACAAGAAAGCTGGGTCTTACATAATATTGCAGCCCTCTTC                     |
| oCS118         | GGGGACAAGTTTGTACAAAAAAGCAGGCTTAATGGAGCACCTTGTAAAGCCTCCAG                   |
| oCS209         | GGGGACAAGTTTGTACAAAAAAGCAGGCTTAATGGTGAGCAAGGGCGAGG                         |
| oCS210         | GGGGACCACTTTGTACAAGAAAGCTGGGTCTTATAAGCCTGCTTTTTTGTACAAACTTG                |
| oCS330         | GTGAACGGGGTGGACAGCGTGGCGTTAGTGGGGATCTAAGAGACAAGATCGAGGTGGTCGGCCGTGGCATTGAC |
| oCS331         | GTCAATGCCACGGCCGACCACCTCGATCTTGTCTTTAGATCCCCACTAACGCCACGCTGTCCACCCCGTTCAC  |
| oCS332         | GAAATGTGGCCTCGCCGAGCTCTTGCAGGTGTCGAGGTTGAGAAAGAGAAGACACAGCTGG              |
| oCS333         | CCAGCTGTGTCTTCTTTTCTCAACCTGCGACACCTGCAAGAGCTCGCGGAGGCCACATTTTC             |
| oCS334         | GGGGACAAGTTTGTACAAAAAAGCAGGCTTAATGGAAACGGGCAACAAATATATAGAAAAA              |
| oCS335         | GGGGACCACTTTGTACAAGAAAGCTGGGTCTTAAAAGCCGGGCCTTTTTTTC                       |
| oCS346         | GGGGACAAGTTTGTACAAAAAAGCAGGCTTACTCAGAAAAACAGGGCTAAAGCAAAA                  |
| oCS347         | GGGGACCACTTTGTACAAGAAAGCTGGGTCTCAATCTTTATTTGCTTGGCTGACCTGC                 |
| oCS348         | GGGGACAAGTTTGTACAAAAAAGCAGGCTTAAGTGCATTAACGGGGCAACG                        |
| oCS349         | GGGGACCACTTTGTACAAGAAAGCTGGGTCTCACTCTTTCTCAACTAATCCACCATCAA                |
| oCS351         | GGGGACCACTTTGTACAAGAAAGCTGGGTCTCACTCTTTCTCAACCTGCGACACCT                   |
| oCS385         | GCTTGAGGGGTGGACAGCGTGGCGTTAGTGGGGATCTAAGAGACAAGATCGAGGTGGTCGGCCGTGGCATTGAC |
| oCS386         | GTCAATGCCACGGCCGACCACCTCGATCTTGTCTTTAGATCCCCACTAACGCCACGCTGTCCACCCCTGCAAGC |
| oTK017_c       | AGGACCCAATCTTCAAATGGCTAAAGTCCAAGCTACATTGCCA                                |
| oTK036         | GGAGCCTGAATGTTGAGTGAATGATGCGGGATCAACAAGACTCATCGTCGTCA                      |
| oTK439         | TATCATATGGCTGCGCCAGCTAGATCTTGCGTCTAT                                       |
| oTK334         | TATGGATCCCTAGTAAGGCTCGGCAGCAAG                                             |
| oCS429         | TGGCTGGAGGAAAGAAAGGTG                                                      |
| oCS430         | GGTGCTGAAGGTGGATACTCTAC                                                    |
| oCS433         | AGAGGGACCAGAACAAGTGAAC                                                     |
| oCS434         | TGAGCTTGATTGGTCTGCAAAG                                                     |
| 33F            | GCGTGGACAAAGTTTTCAACCG                                                     |
| 33R            | TCTGGTACCCTCATCAGGCATC                                                     |

**Supplemental Table 5: Constructs.**

| Use                                         | Final plasmid | Cloning Method   | Template                             | Cloning primers | Backbone vector           | Insert                                      | Reference                                     |
|---------------------------------------------|---------------|------------------|--------------------------------------|-----------------|---------------------------|---------------------------------------------|-----------------------------------------------|
| Entry vectors for LR cloning                | pSC049        | /                | /                                    | /               | pDONR207                  | dSP-AVR-Pia with start without stop (20-85) | Cesari et al., 2013                           |
|                                             | pSC060        | /                | /                                    | /               | pDONR207                  | dSP-AVR-Pia with start with stop (20-85)    | Cesari et al., 2014                           |
|                                             | pSC120        | GTW BP           | pTH123.1                             | oCS108/oCS109   | pDONR207                  | dSP-PWL2 with start with stop (22-145)      |                                               |
|                                             | pSC129        | /                | /                                    | /               | pDONR207                  | RGA5_Cter with stop (883-1116)              | Cesari et al., 2013                           |
|                                             | pSC210        | /                | /                                    | /               | pDONR207                  | RGA5_deltaHMA with stop (1-996)             | Cesari et al., 2014                           |
|                                             | pSC309        | GTW BP           | pBIN19-YFP-GTW                       | oCS209/oCS210   | pDONR207                  | YFP with stop                               | Cesari et al., 2014                           |
|                                             | pSC467        | Quikchange       | pSC057                               | oCS330/oCS331   | pDONR207                  | RGA5m1 with stop (1-1116)                   | Cesari et al., 2014                           |
|                                             | pSC468        | quikchange       | pSC057                               | oCS332/oCS333   | pDONR207                  | RGA5m2 with stop (1-1116)                   |                                               |
|                                             | pSC469        | quikchange       | pSC467                               | oCS332/oCS333   | pDONR207                  | RGA5m1m2 with stop (1-1116)                 |                                               |
|                                             | pSC470        | quikchange       | pSC207                               | oCS330/oCS331   | pDONR207                  | RGA5_HMAm1 with stop (997-1072)             |                                               |
|                                             | pSC472        | GTW BP           | pSC469                               | oCS348/oCS351   | pDONR207                  | RGA5_HMAm1m2 with stop (991-1072)           |                                               |
|                                             | pSC474        | GTW-BP           | pTK210                               | oCS334/oCS335   | pDONR207                  | dSP-AVR-PikD with stop (22-113)             |                                               |
|                                             | pSC500        | GTW-BP           | pSC496                               | oCS346/oCS347   | pDONR207                  | Pikp-1_HMA with stop (182-263)              |                                               |
|                                             | pSC501        | GTW-BP           | pSC057                               | oCS348/oCS349   | pDONR207                  | RGA5_HMA with stop (991-1072)               |                                               |
|                                             | pSC502        | GTW-BP           | pSC469                               | oCS118/oCS080   | pDONR207                  | RGA5_C-ter_m1m2 with stop (883-1116)        |                                               |
|                                             | pSC629        | GTW-BP           | pSC467                               | oCS348/oCS349   | pDONR207                  | RGA5_HMAm1 with stop (991-1072)             |                                               |
|                                             | pSC630        | GTW-BP           | pSC468                               | oCS348/oCS351   | pDONR207                  | RGA5_HMAm2 with stop (991-1072)             |                                               |
|                                             | pSC631        | GTW-BP           | pSC467                               | oCS118/oCS080   | pDONR207                  | RGA5_Cter_m1 with stop (883-1116)           |                                               |
|                                             | pSC632        | GTW-BP           | pSC468                               | oCS118/oCS080   | pDONR207                  | RGA5_Cter_m2 with stop (883-1116)           |                                               |
|                                             | Y2H           | pSC001           | /                                    | /               | /                         | pGBKT7-BD                                   | BD:dSP-AVR1-CO39 (22-89)                      |
| pCV243                                      |               | GTW LR           | pSC060                               | /               | pGBKT7-BD_GTW             | BD:dSP-AVR-Pia (20-85)                      |                                               |
| pSC490                                      |               | GTW LR           | pSC474                               | /               | pGBKT7-BD_GTW             | BD:dSP-AVR-PikD (22-113)                    |                                               |
| pGBKT7-BD                                   |               | GTW LR           | /                                    | /               | pGBKT7-BD                 | BD                                          | Clontech                                      |
| pSC548                                      |               | GTW LR           | pSC501                               | /               | pGADT7-AD_GTW             | AD:RGA5_HMA (991-1072)                      |                                               |
| pSC636                                      |               | GTW LR           | pSC629                               | /               | pGADT7-AD_GTW             | AD:RGA5_HMAm1 (991-1072)                    |                                               |
| pSC637                                      |               | GTW LR           | pSC630                               | /               | pGADT7-AD_GTW             | AD:RGA5_HMAm2 (991-1072)                    |                                               |
| pSC485                                      |               | GTW LR           | pSC472                               | /               | pGADT7-AD_GTW             | AD:RGA5_HMAm1m2 (991-1072)                  |                                               |
| pCV226                                      |               | GTW LR           | pSC129                               | /               | pGADT7-AD_GTW             | AD:RGA5_Cter (883-1116)                     |                                               |
| pSC638                                      |               | GTW LR           | pSC631                               | /               | pGADT7-AD_GTW             | AD:RGA5_Cter_m1 (883-1116)                  |                                               |
| pSC639                                      |               | GTW LR           | pSC632                               | /               | pGADT7-AD_GTW             | AD:RGA5_Cter_m2 (883-1116)                  |                                               |
| pSC549                                      |               | GTW LR           | pSC502                               | /               | pGADT7-AD_GTW             | AD:RGA5_Cter_m1m2 (883-1116)                |                                               |
| pSC547                                      |               | GTW LR           | pSC500                               | /               | pGADT7-AD_GTW             | AD:Pikp-1_HMA (182-263)                     |                                               |
| pGADT7-AD                                   | GTW LR        | /                | /                                    | pGADT7-AD       | AD                        | Clontech                                    |                                               |
| Co-IP and HR tests in <i>N. benthamiana</i> | pSC065.3      | GTW LR           | pSC049                               | /               | pBIN19-GTW-3HA            | dSP_AVR-Pia:3HA (20-85)                     |                                               |
|                                             | pSC495.1.1    | GTW LR           | /                                    | /               | pCambia1300               | dSP_AVR-PikD:HA (22-113)                    | Maqbool et al., 2015                          |
|                                             | pSC598.1      | GTW LR           | /                                    | /               | pCambia1300               | dSP_AVR-PikC:HA (22-113)                    | Maqbool et al., 2015                          |
|                                             | pD0134        | GTW LR           | pSC120                               | /               | pBIN19-3HA-GTW            | 3HA:PWL2 (22-145)                           |                                               |
|                                             | pSC545.2      | GTW LR           | pSC501                               | /               | pBIN19-YFP-GTW            | YFP:RGA5_HMA (991-1072)                     |                                               |
|                                             | pSC478.2.1    | GTW LR           | pSC470                               | /               | pBIN19-YFP-GTW            | YFP:RGA5_HMAm1 (997-1072)                   |                                               |
|                                             | pSC480.1      | GTW LR           | pSC472                               | /               | pBIN19-YFP-GTW            | YFP:RGA5_HMAm1m2 (991-1072)                 |                                               |
|                                             | pSC544.2      | GTW LR           | pSC500                               | /               | pBIN19-YFP-GTW            | YFP:Pikp-1_HMA (182-263)                    |                                               |
|                                             | pSC276        | GTW LR           | pSC210                               | /               | pBIN19-YFP-GTW            | YFP:RGA5_deltaHMA (1-996)                   |                                               |
|                                             | pSC310        | GTW LR           | pSC309                               | /               | pBIN19-YFP-GTW            | YFP                                         |                                               |
|                                             | pSC078.3      | /                | /                                    | /               | pBIN19-YFP-GTW            | YFP:RGA5 (1-1116)                           | Cesari et al., 2013                           |
|                                             | pSC475        | GTW LR           | pSC467                               | /               | pBIN19-YFP-GTW            | YFP:RGA5m1 (1-1116)                         |                                               |
|                                             | pSC476        | GTW LR           | pSC468                               | /               | pBIN19-YFP-GTW            | YFP:RGA5m2 (1-1116)                         |                                               |
|                                             | pSC477.1      | GTW LR           | pSC469                               | /               | pBIN19-YFP-GTW            | YFP:RGA5m1m2 (1-1116)                       |                                               |
|                                             | pSC061        | /                | /                                    | /               | pBIN19-3HA-GTW            | RGA4:3HA (1-996)                            | Cesari et al., 2013                           |
| pSC095                                      | /             | /                | /                                    | pBIN19-GTW-3HA  | dSP_AVR-Pia (20-85)       | Cesari et al., 2014                         |                                               |
| pSC497                                      | /             | /                | /                                    | pICSL4723       | Pikp-1:Hellfire/Pikp-2:HA | provided by Mark Banfield                   |                                               |
| Magnaporthe oryzae transformation           | pCV10         | yeast gap repair | genomic DNA of <i>M. oryzae</i> IN03 | oTK017_c/oTK036 | pDL02                     | pRP27::SP-AVR1-CO39 (1-89)                  | (identical to pCB027 from Ribot et al, 2013 ) |
|                                             | pCB1004-pex22 | /                | /                                    | /               | pCB1004                   | pAVR-Pia::SP-AVR-Pia (1-85)                 | Yoshida et al., 2009                          |
|                                             | pCB1004-pex31 | /                | /                                    | /               | pCB1004                   | pAVR-PikD::SP-AVR-PikD (1-113)              | Yoshida et al., 2009                          |
|                                             | pCB1004-EV    | /                | /                                    | /               | pCB1004                   | Empty vector                                | Yoshida et al., 2009                          |
| Rice stable transgenics                     | pSC038        | /                | /                                    | /               | pCambia1300               | pRGA4::RGA4genomic                          | Cesari et al., 2013                           |
|                                             | pSC086        | /                | /                                    | /               | pCambia2300               | pRGA5::RGA5genomic                          | Cesari et al., 2013                           |
|                                             | pADu52.3      | Quikchange       | pAHC17-pRGA5::RGA5                   | oSC385/oCS386   | pCambia2300               | pRGA5::RGA5m1                               | Okuyama et al., 2011                          |
|                                             | pADu50.3      | Quikchange       | pAHC17-pRGA5::RGA5                   | oSC332/oCS333   | pCambia2300               | pRGA5::RGA5m2                               | Okuyama et al., 2011                          |
| pADu51.3                                    | Quikchange    | pADu52.3         | oSC332/oCS333                        | pCambia2300     | pRGA5::RGA5m1m2           |                                             |                                               |
| SPR                                         | pCV64         | /                | /                                    | /               | pET15b                    | dSP-AVR-Pia                                 | de Guillen et al., 2015                       |
|                                             | pCV61.2       | /                | /                                    | /               | pET15b                    | dSP-AVR1-CO39                               | de Guillen et al., 2015                       |
|                                             | pLM004        | in fusion        | synthetic gene                       | /               | pDB_ccdb_his_3C           | dSP-AVR-PikD                                |                                               |
|                                             | pLM003        | in fusion        | synthetic gene                       | /               | pDb_ccdb_pepL_his_3C      | dSP-AVR1-CO39 T41G                          |                                               |
|                                             | pCV147        | recombination    | pSC60                                | oTK439/oTK334   | pET15b                    | dSP-AVR-Pia F24S                            | Ortiz et al., 2017                            |
|                                             | pLM012        | in fusion        | synthetic gene                       | /               | pDB_ccdb_his_MBP_3C       | MBP:RGA5_HMA                                |                                               |
|                                             | pLM015        | in fusion        | synthetic gene                       | /               | pDB_ccdb_his_MBP_3C       | MBP:RGA5_HMAm1                              |                                               |
|                                             | pLM018        | in fusion        | synthetic gene                       | /               | pDB_ccdb_his_MBP_3C       | MBP:RGA5_HMAm1m2                            |                                               |
|                                             | pLM009        | in fusion        | synthetic gene                       | /               | pDB_ccdb_his_MBP_3C       | MBP:Pikp-1_HMA                              |                                               |
